1 **Recombination of ecologically and evolutionarily significant loci maintains genetic**  
2 **cohesion in the *Pseudomonas syringae* species complex**

3  
4 Marcus M. Dillon<sup>\*a</sup>, Shalabh Thakur<sup>\*a</sup>, Renan N.D. Almeida<sup>a</sup>, and David S. Guttman<sup>a,b</sup>

5  
6 <sup>a</sup> Department of Cell & Systems Biology, University of Toronto, 25 Willcocks St., Toronto, Ontario,  
7 Canada

8  
9 <sup>b</sup> Centre for the Analysis of Genome Evolution & Function, University of Toronto, Toronto, Ontario,  
10 Canada

11  
12 \*These authors contributed equally to this work.

13  
14  
15 **Corresponding Author:**

16 David S. Guttman  
17 25 Willcocks St., ESC 4041  
18 Toronto, ON M5S 3B2  
19 Phone: 416-978-6865  
20 Email: david.guttman@utoronto.ca

21  
22  
23 Running Title: Genetic cohesion in the *P. syringae* complex

24  
25 **Keywords:** *Pseudomonas syringae*, comparative genomics, species definition, recombination

26 **ABSTRACT**

27

28 *Pseudomonas syringae* is a highly diverse bacterial species complex capable of causing a wide range of  
29 serious diseases on numerous agronomically important crop species. Here, we examine the evolutionary  
30 relationships of 391 agricultural and environmental strains from the *P. syringae* species complex using  
31 whole-genome sequencing and evolutionary genomic analyses. Our collection includes strains from 11  
32 of the 13 previously described phylogroups isolated off of over 90 hosts. We describe the phylogenetic  
33 distribution of all orthologous gene families in the *P. syringae* pan-genome, reconstruct the phylogeny of  
34 *P. syringae* using a core genome alignment and a hierarchical clustering analysis of pan-genome content,  
35 predict ecologically and evolutionary relevant loci, and establish the forces of molecular evolution  
36 operating on each gene family. We find that the common ancestor of the species complex likely carried  
37 a Rhizobium-like type III secretion system (TTSS) and later acquired the canonical TTSS. The  
38 phylogenetic analysis also showed that the species complex is subdivided into primary and secondary  
39 phylogroups based on genetic diversity and rates of genetic exchange. The primary phylogroups, which  
40 largely consist of agricultural isolates, are no more divergent than a number of other bacterial species,  
41 while the secondary phylogroups, which largely consists of environmental isolates, have levels of  
42 diversity more in line with multiple distinct species within a genus. An analysis of rates of recombination  
43 within and between phylogroups revealed a higher rate of recombination within primary phylogroups than  
44 between primary and secondary phylogroups. We also found that “ecologically significant” virulence-  
45 associated loci and “evolutionarily significant” loci under positive selection are over-represented among  
46 loci that undergo inter-phylogroup genetic exchange. These results indicate that while inter-phylogroup  
47 recombination occurs relatively rarely in the species complex, it is an important force of genetic cohesion,  
48 particularly among the strains in the primary phylogroups. This level of genetic cohesion and the shared  
49 plant-associated niche argues for considering the primary phylogroups as a true biological species.

## 50 INTRODUCTION

51

52 *Pseudomonas syringae* is a globally significant, gram-negative bacteria that is responsible for causing a  
53 wide-spectrum of diseases on many agronomically important crops [1]. However, despite the broad host  
54 range of the *P. syringae* species complex, individual strains are highly host-specific, causing disease on  
55 only a limited range of plant species or cultivars. Furthermore, although the majority of well-characterized  
56 strains of *P. syringae* are pathogens, an increasingly number of isolates have been recovered from non-  
57 agricultural habitats that include wild plants, soil, lakes, rainwater, and clouds [2]. The diverse host range,  
58 strong host specificity, and ubiquitous distribution of *P. syringae* complex strains have made them an  
59 excellent model for studying host-pathogen interactions [3-6].

60

61 Taxonomically, the *P. syringae* species complex has been subdivided into approximately 64 pathovars  
62 based on host range and pathogenic characteristics, nine genomospecies based on DNA-DNA  
63 hybridization assays, and 13 phylogroups based on multilocus sequence analyses [7-9]. The 16S rRNA  
64 gene has also been used to differentiate strains in the *P. syringae* species complex, particularly in the  
65 context of discriminating the distinctly named species within the complex, including: *P. amygdali*, *P.*  
66 *avellanae*, *P. caricapapayae*, *P. cichorii*, *P. ficuserectae*, *P. meliae*, *P. savastanoi*, *P. syringae*, and *P.*  
67 *viridiflava* [10]. Nevertheless, no single locus has been found that has the ability to discriminate all  
68 *Pseudomonas* species, and importantly, these different methods often disagree on how the *P. syringae*  
69 complex should be delimited [5, 7, 8, 11-15].

70

71 Identifying genetic boundaries within and between bacterial species, and the subsequent naming of these  
72 groups, provides important insight into fundamental biological processes, as well assisting with “real  
73 world” practical decision making. From the pathologist’s perspective, who is concerned about the  
74 emergence, spread, and impact of pathogenic clones, understanding diversity and population structure  
75 is central to determining if a particular strain has the genetic potential to cause a disease on a particular  
76 crop variety and the most effective means to control the dissemination of a newly emergent pathogen

77 clone. From a fundamental perspective, understanding natural population structure provides insight into  
78 the ecological and evolutionary pressures that give rise to natural genetic diversity, help disentangle the  
79 roles played by the different evolutionary forces, and identify specific genes that are required for the  
80 success of a strain in a particular ecological context, e.g. host specificity loci.

81

82 A significant hurdle to identifying ecologically meaningful genetic boundaries in *P. syringae* is the lack of  
83 correlation between genotypic and phenotypic similarity among strains. While *P. syringae* strains can be  
84 genetically very diverse, there are few if any definitive phenotypic traits that can reliably partition strains  
85 into major groups that are congruent with the genetic data [9, 16, 17]. For example, pathogens causing  
86 disease on a single crop are often found in multiple phylogenetic groups [8, 18-20]. Furthermore, several  
87 non-pathogenic environmental isolates are closely related to well-established *P. syringae* pathogens [21,  
88 22]. Many of the methods that have been used to classify strains in the *P. syringae* species complex are  
89 thus forced to rely on ad hoc distinctions [23], which can lead to either the artefactual clustering of distinct  
90 lineages or splitting of cohesive monophyletic clades [24][11].

91

92 The alternative to using ad hoc distinctions or metrics to identify biological groups is to employ a  
93 theoretical framework based on evolutionary theory. Species concepts provide a theoretical basis for  
94 understanding the evolutionary and ecological forces, such as reproductive isolation, recombination,  
95 mutation, selection, and genetic drift, that drive diversification or cohesion of distinct genetic units [5].  
96 Furthermore, unlike ad hoc species delimitation approaches, species concepts can help to define species  
97 boundaries for all isolates of a group irrespective of their specific niche or phenotype. In bacteria, the  
98 ability to horizontally exchange DNA can limit the impact of reproductive isolation; consequently,  
99 recombination, selection, and genetic drift all play a prominent role in defining species boundaries [5].

100

101 One class of models that have proven useful for understanding bacterial species are based on the  
102 concept of ecotypes. An ecotype is a genetic lineage occupying a defined niche. The basic ecotype model  
103 describes how genotypes carrying advantageous mutations arise periodically through mutation and

104 sweep through a population as selection enables them to outcompete other members of the population  
105 [25-29]. The extent of spread of these beneficial mutations defines the boundaries of the ecotype. These  
106 recurrent selective sweeps, in combination with the accumulation of neutral mutations through genetic  
107 drift, purge genetic diversity within distinct populations, while increasing the genetic divergence between  
108 ecotypes, ultimately resulting in genetic isolation.

109

110 The primary brake on this divergence process is homologous recombination, which can transfer  
111 beneficial (as well as neutral) variation between distinct ecotypes, thus breaking down genetic isolation  
112 and maintaining genetic cohesion between ecotypes [24, 30-40]. Ultimately, the ability of recombination  
113 to disseminate these advantageous mutations among ecotypes defines the ecological boundaries of the  
114 species. The strength of recombination relative to the rate of neutral mutation and genetic drift will  
115 determine if distinct ecotypes evolve. Any decline in the frequency of homologous recombination between  
116 ecotypes, whether due to physical barriers and/or ecological partitioning, will help solidify the genetic  
117 isolation between ecotypes and formation of species. Countering this, the transfer of important genes  
118 that are critical for the exploitation of a specific niche (e.g. the interaction between a microbe and its host)  
119 may prove to be especially important for maintaining genetic cohesion in pathogenic bacterial populations  
120 like *P. syringae*.

121

122 Despite its potentially critical importance for defining species boundaries in bacteria, relatively little is  
123 known about the genome-wide extent of recombination between strains from different phylogroups of the  
124 *P. syringae* species complex because prior studies have primarily focused on a small set of housekeeping  
125 genes in the core genome [8, 41, 42]. However, we do know that at least some strains of *P. syringae*  
126 undergo relatively high rates of recombination, and this limited sample size of genes suggests that inter-  
127 phylogroup homologous recombination is considerably more rare than intra-phylogroup homologous  
128 recombination [42]. This could mean that there is no cohesive *P. syringae* species complex and each  
129 phylogroup represents a separate species. Alternatively, it is possible that the majority of inter-phylogroup  
130 recombination is occurring in the accessory genome, which would still maintain the genetic cohesion

131 between phylogroups. It is currently not possible to distinguish between these possibilities based only on  
132 recombination analyses of a small set of core genes given that most ecologically and evolutionarily  
133 relevant genes are in the accessory genome and, by definition, only shared by a subset of strains in the  
134 *P. syringae* species complex [6, 18]. Clearly, a more thorough analysis of the rates of recombination for  
135 ecologically and evolutionarily relevant loci in the accessory genome is required to determine whether  
136 clear species barriers exist within the *P. syringae* species complex.

137

138 Here, we performed the whole-genome comparative and evolutionary analyses of 391 genomes from the  
139 *P. syringae* complex, including pathogenic isolates from diseased crops and non-pathogenic  
140 environmental isolates. In total, our collection of whole-genome sequences contains representatives from  
141 11 of the 13 distinct phylogroups, including all seven phylogroups that we consider to be primary (1, 2, 3,  
142 4, 5, 6, and 10) and four of the six phylogroups that we consider to be secondary (7, 9, 11, and 13). These  
143 strains enabled us to describe the phylogenetic distribution of all orthologous gene families in the pan-  
144 genome of the *P. syringae* species complex, refine the phylogenetic relationships between *P. syringae*  
145 strains using whole-genome data, predict ecologically and evolutionary relevant loci in the *P. syringae*  
146 species complex, and evaluate the impact of recombination, selection, and genetic drift on each ortholog  
147 family. Taken together, the analyses allowed us to investigate the evolutionary mechanisms that maintain  
148 genetic cohesion between *P. syringae* strains, and attain an enhanced understanding of the species  
149 barriers that exist in the *P. syringae* species complex.

150

## 151 **RESULTS**

152

### 153 **Genome Assemblies and Annotations**

154 In addition to the 135 publically available genome assemblies of *P. syringae*, we performed whole-  
155 genome sequencing and assembly on 256 new strains obtained from the International Collection of  
156 Microorganisms from Plants (ICMP) and other collaborators. The ICMP strains included 62 type and  
157 pathotype strains of *P. syringae* (BioProject Accession: PRJNA292453) [43]. Type strains are the isolates

158 to which the scientific name of that organism is formally attached under the rules of prokaryote  
159 nomenclature. Pathotype strains have the additional requirement of displaying the pathogenic  
160 characteristics of the specific pathovar (i.e., causing specific disease symptoms on a particular host) [44].  
161 Twenty-two non-*P. syringae* strains (twelve newly sequenced, ten from public databases) belonging to  
162 the *Pseudomonas* genus were also used as outgroups when required. In total, we analyzed whole-  
163 genome assemblies of 391 *P. syringae* strains representing 11 of the 13 phylogroups in the *P. syringae*  
164 species complex, thus enabling the most comprehensive analyses of the diversity that exists in this  
165 species to date (Supplemental Dataset S1).

166

167 All whole-genome sequencing performed in this study was accomplished using either the Illumina GAIIx  
168 platform, resulting in 36-bp or 75-bp paired-end reads, or the Illumina MiSeq platform, resulting in 152-  
169 bp paired-end reads. In sum, we generated between 614,546 to 42,765,634 paired-end reads for each  
170 genome, for an average depth of coverage ranging between 15 and 700x. Adapters and low-quality bases  
171 were trimmed from the raw reads using Trimmomatic [45], and *de novo* assembly and quality filtering  
172 were performed using CLC Genomics Workbench (CLC Genomics Work Bench 2012). After quality  
173 filtering, the final N50 value for each assembly was between 1,457 and 316,542 bps, the number of  
174 contigs was between from 59 to 5,196, and the size of each *P. syringae* genome was between 5,097,969  
175 and 7,217,414 bps (Supplemental Dataset S2). These values represent high quality assemblies that are  
176 consistent with the draft genome assemblies that we obtained from public database (Supplemental  
177 Dataset S1; Figure S1).

178

179 *De novo* gene prediction and annotation was performed on all newly assembled and publically available  
180 genomes using a consensus approach based on Glimmer, GeneMark, FragGeneScan, and Prodigal, as  
181 implemented by DeNoGAP (Supplmental Dataset S3; see Methods) [46-50]. Reliable calls that  
182 overlapped by more than 15 bps were merged into a single coding sequence and all genes were  
183 functionally annotated by blasting against the UniProtKB/SwissProtKB database [51]. Gene ontology  
184 terms, protein domains, and metabolic pathways were also assigned to each coding sequence using

185 InterProScan [52], while COG categories were assigned by blasting predicted genes against the Cluster  
186 of Orthologous Groups (COG) Database [53]. These methods predicted an average of  $5,491 \pm 25.69$   
187 (SEM) genes per *de novo* *P. syringae* draft assembly (Supplemental Dataset S1), and in cases where a  
188 corresponding annotation was publically available, the two annotations were largely in agreement.  
189 However, among the 135 publically available genomes, we did predict an additional 29,748 genes, for  
190 an average of  $220,36 \pm 11.81$  (SEM) additional genes per genome (Supplmental Dataset S4).

191

## 192 **Evolutionary Relationships Between Strains**

193 **Core and accessory genetic content:** Using all 413 genome assemblies (391 *P. syringae*, 22  
194 outgroups), we clustered and differentiated homologous families using the DeNoGAP comparative  
195 genomics pipeline [46]. The 2,294,719 protein sequences present across all genomes were first clustered  
196 into 241,678 HMM families based on the stringent percent identity and alignment coverage thresholds of  
197 70%. Similar HMM families connected via single-linkage clustering (i.e. sharing at least one sequence  
198 between the different families) were then combined, resulting in a total of 83,373 homolog families.  
199 Finally, these homolog families were split into orthologous and paralogous families using the reciprocal  
200 smallest distance approach and the MCL algorithm, resulting in a total of 98,567 ortholog families. Of the  
201 98,567 ortholog families, 77,728 were present in at least one *P. syringae* strain, representing both the  
202 core and accessory genome content of the *P. syringae* species complex.

203

204 Despite the fact that the total number of protein-coding genes in each *P. syringae* genome is similar, the  
205 composition of each genome, with respect to the specific complement of genes, is remarkably divergent.  
206 Specifically, we estimate that only 2,457 of the 77,728 *P. syringae* ortholog families (3.16%) are part of  
207 the soft core genome, based on the presence of a given ortholog family in at least 95% of strains. This  
208 soft core genome cutoff is justified by the fact that core genome cutoffs that are overly strict result  
209 eliminate a number of genuine core ortholog families as the result of assembly and annotation errors.  
210 Indeed, as we incrementally increase the frequency of strains that a ortholog must be present in for it to  
211 be considered part of the core genome from 50% to 100%, we find that there is a sharp drop-off in the



212 core genome size at ~95% (Figure S2), representing the point at which we expect a number of genuine  
213 core genome ortholog families to be lost due to assembly and annotation errors. The number of orthologs  
214 that are part of the hard core genome (present in 100% of strains), for example, is only 124. As more  
215 genomes are sampled, we expect the core genome size to decrease incrementally, but that this effect  
216 will diminish as a more representative sample of the *P. syringae* complex is obtained. We asked  
217 whether we would expect further declines in the core genome size of *P. syringae* species if we sampled  
218 more genomes using a gene accumulation rarefaction curve with PanGP, which characterizes the  
219 exponential decay of the core genome as each new genome is added to the analysis [54]. The soft core  
220 genome curve plateaus as it approaches the core genome size of 2,457, when only approximately 50  
221 genomes have been sampled (Figure 1A), suggesting that the core genome of the *P. syringae* complex  
222 would be unlikely to change significantly by sampling more *P. syringae* genomes.

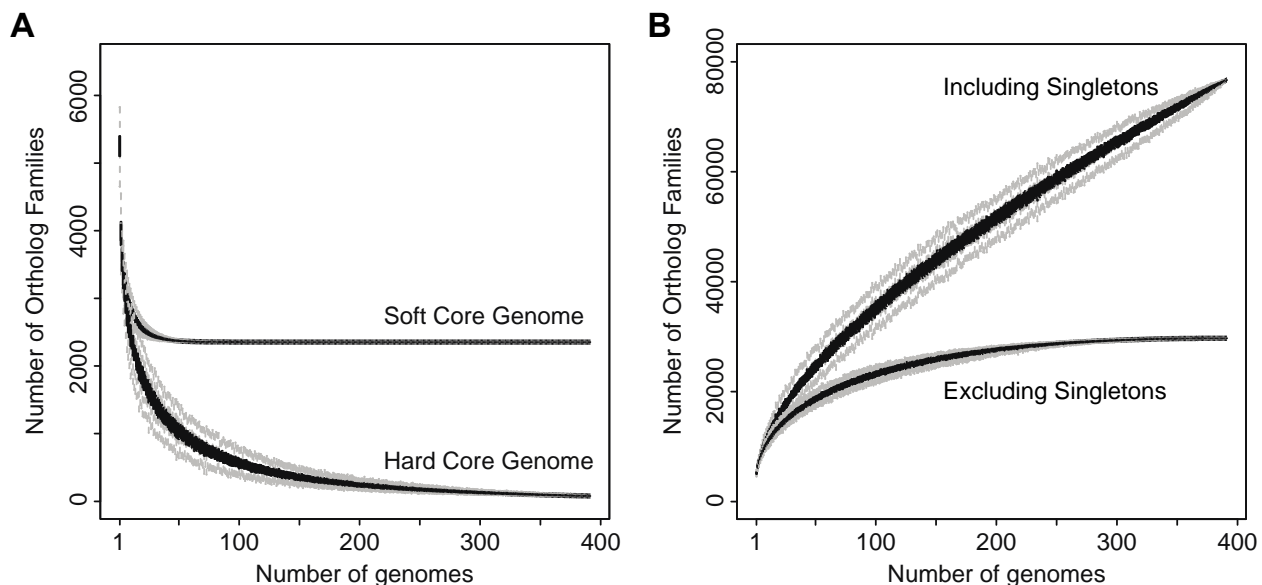

223

224 **Figure 1:** Rarefaction curves for the core (A) and accessory (B) genome of *P. syringae*, as estimated  
225 using PanGP. A) Families present in 95% (soft core genome) and 100% (hard core genome) of *P.*  
226 *syringae* strains exponentially decays as each new genome is added to the analysis. B) The total number  
227 of gene families identified continues to increase indefinitely as each new genome is added to the analysis  
228 when singleton gene families (families that are only present in one strain) are included, suggesting that  
229 *P. syringae* has an open pan-genome.

230

231 The small size of the core genome in the *P. syringae* species complex results in an expansive accessory  
232 genome, comprising 75,271 of the 77,228 *P. syringae* ortholog families (96.84%). Unlike the core

233 genome, the accessory genome is expected to increase as more genomes are sampled until sufficient  
234 genomes have been sampled to capture all of the gene content diversity of the species. Only 28,165  
235 (37.42%) of the accessory ortholog families in *P. syringae* were present in more than one strain, while  
236 the remaining 47,106 (62.58%) ortholog families were singletons present in only a single strain. We used  
237 the micropan package [55] to assess if the pan-genome of *P. syringae* is open or closed. A closed pan-  
238 genome indicates that sampling of ortholog families has neared saturation, while an open pan-genome  
239 indicates that there is still a large pool of as yet undiscovered ortholog families. Micropan estimated a  
240 decay parameter ( $\alpha$ ) of 0.64 using Heap's Law Model [55], which is well below the critical threshold  
241 of  $\alpha = 1.0$  that distinguishes open from closed genomes. These findings are in agreement with a  
242 gene accumulation rarefaction analysis of the accessory genome, which has not plateaued (Figure 1B),  
243 and demonstrates that each strain introduces ~193 new ortholog families into the *P. syringae* pan-  
244 genome. Taken together, these analyses suggest that *P. syringae* possesses an open pan-genome, and  
245 that we are likely to continue to identify novel accessory ortholog families as additional *P. syringae* strains  
246 are sampled.

247

248 Overall, the distribution of ortholog families among *P. syringae* strains shows that the vast majority of  
249 families are either very common or very rare (Figure S3). This pattern is a strong indicator that lateral  
250 gene transfer is common throughout the *P. syringae* complex, and may explain its expansive accessory  
251 genome consisting of mostly singleton orthologs. While a number of these singleton orthologs were  
252 functionally annotated, signifying that they are genuine genes, 68.47% of singleton ortholog families were  
253 annotated as hypothetical proteins, compared to only 43.83% of other ortholog families (Chi-squared  
254 test;  $\chi^2 = 1.16 \times 10^{-4}$ ,  $df = 1$ ,  $p < 0.0001$ ). This suggests that these genes may represent a diverse  
255 collection of yet unexplored niche specific genes in *P. syringae*, although some of these singleton  
256 ortholog families are likely the result of annotation errors associated with draft genome sequencing [56].

257

258 **Phylogenetics:** Based on multilocus sequence analysis (MLSA), the *P. syringae* species complex has  
259 currently been separated into 13 distinct phylogroups [9], seven of which we consider to be 'primary'

260 phylogroups (phylogroups 1, 2, 3, 4, 5, 6, and 10) as they are monophyletic and quite genetically distinct  
261 from the more divergent ‘secondary’ phylogroups, include the traditionally recognized diversity of the  
262 species as well as nearly all of the type and pathotype strains, and predominantly carry the canonical *P.*  
263 *syringae* type III secretion system (discussed below). The remaining six “secondary” phylogroups  
264 (phylogroups 7, 8, 9, 11, 12, and 13) include a number of species not traditionally associated with the *P.*  
265 *syringae* complex such as *P. viridiflava* and *P. cichorii*, and rarely carry a canonical *P. syringae* type III  
266 secretion system. Additionally, many of the strains from the secondary phylogroups have been isolated  
267 from environmental (e.g. water and soil) sources, whereas the vast majority of strains from the primary  
268 phylogroups were isolated from aerial plants surfaces.

269

270 We first sought to refine the phylogenetic relationships between strains in the *P. syringae* species  
271 complex using a core genome alignment of the 391 strains analyzed here. The core genome tree was  
272 constructed based on a concatenated multiple alignment of the 2,457 soft core genes using FastTree  
273 with an SH-TEST branch support cutoff of 70% (Figure 2A). The core genome tree delineates these 391  
274 strains into distinct clades representing 11 of the 13 phylogroups in the *P. syringae* species complex.  
275 Therefore, our phylogroup assignments agree with those described earlier based on a smaller collection  
276 of type strains analyzed by MLSA [7-9]. However, the clustering of strains within each phylogenetic group  
277 does differ somewhat from earlier MLSA based phylogenetic analyses [57]. This suggests that some of  
278 the more fine-scale phylogenetic relationships were not resolved, or improperly resolved due to  
279 recombination in the MLSA analysis, which were performed on a smaller collection of strains and with  
280 seven or less MLSA loci. Phylogenetic inferences based on the entire core genome should average out  
281 the majority of gene-specific biases that result from the distinct evolutionary histories of individual genes,  
282 thus providing a more accurate phylogenetic picture of the clonal relationships in the *P. syringae* species  
283 complex and enhancing our ability to explore phylogenetic relationships within and among phylogroups.

284

285 We also assessed *P. syringae* strain relationships based on a hierarchical clustering analysis of  
286 orthologous gene content, which are simply computed as binary vectors describing the presence or

287 absence of each ortholog family in each strain. Hierarchical clustering of the phylogenetic profiles  
288 effectively delineated *P. syringae* strains into their respective phylogroups in most cases (Figure 2B), but  
289 some key differences exist between the gene content and core genome trees. The most obvious case of  
290 incongruence between the core genome and gene content trees involves the relationship between  
291 phylogroup 2 and phylogroup 10. In the gene content tree, phylogroups 2 and 10 cluster together with all  
292 strains from these phylogroups forming a monophyletic group. This branching pattern is inconsistent with  
293 the core genome tree, where phylogroup 2 clusters with phylogroups 3 and 6, and phylogroup 10 clusters  
294 with phylogroup 5. The clustering of phylogroups 2 and 10 in the gene content tree can be traced back  
295 to their shared ortholog content. Strains from phylogroup 10 share an average of 3,918 orthologs with  
296 strains from phylogroup 2, which is more than they share with any other phylogroup, including phylogroup  
297 5 (3,684 orthologs). There are also a number of finer scale differences between the core genome and  
298 gene content trees that involve the clustering of strains within each phylogroup. Overall, these examples  
299 of phylogenetic discordance between the core genome and gene content trees suggests that while  
300 horizontal gene transfer between strains of *P. syringae* is not sufficiently strong to consistently overwhelm  
301 the signal of vertical gene inheritance, recombination events that result in shared genome content  
302 between distantly related strains are occurring regularly between strains of the *P. syringae* species  
303 complex [58].

A

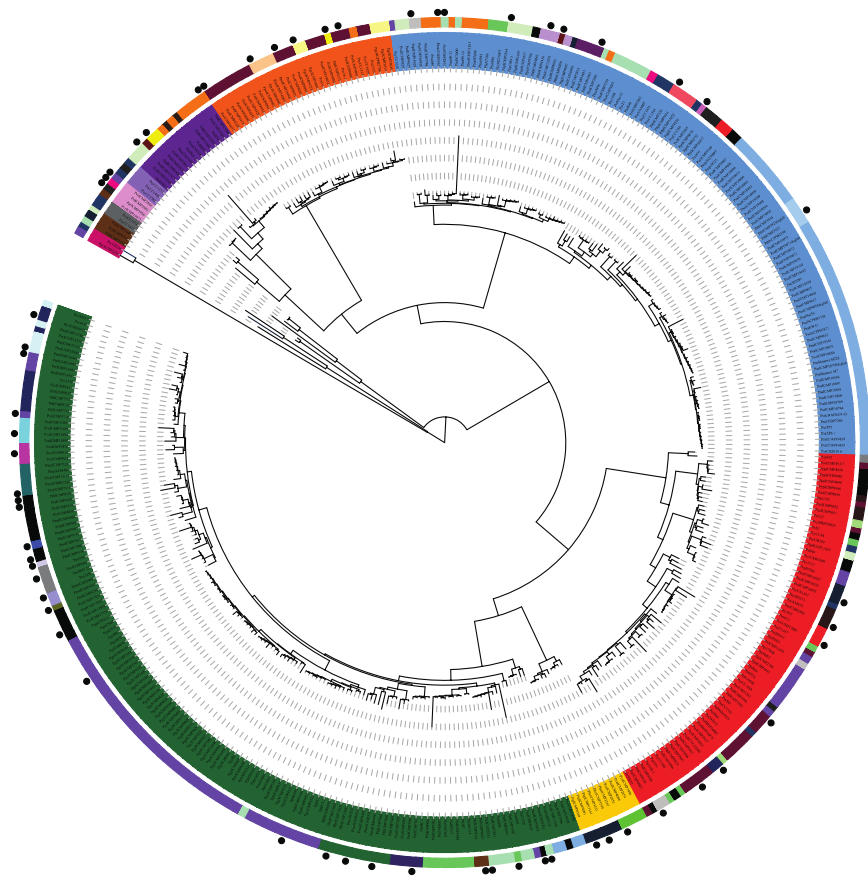

● Type Strain

Phylogroup

- Phylogroup 1
- Phylogroup 2
- Phylogroup 3
- Phylogroup 4
- Phylogroup 5
- Phylogroup 6
- Phylogroup 7
- Phylogroup 9
- Phylogroup 10
- Phylogroup 11
- Phylogroup 13

Host of Isolation

- Aceraceae
- Actinidiaceae
- Adoxaceae
- Amaranthaceae
- Amaryllidaceae
- Apiaceae
- Apocynaceae
- Araliaceae
- Asteraceae
- Berberidaceae
- Betulaceae
- Brassicaceae
- Cannabaceae
- Caricaceae
- Cucurbitaceae
- Cupressaceae
- Daphniphyllaceae
- Environmental
- Fabaceae
- Fagaceae
- Grossulariaceae
- Hippocastanaceae
- Hydrangeaceae
- Malvaceae
- Meliaceae
- Moraceae
- Myricaceae
- Oleaceae
- Pedaliaceae
- Plantaginaceae
- Poaceae
- Primulaceae
- Ranunculaceae
- Rosaceae
- Rubiaceae
- Rutaceae
- Solanaceae
- Theaceae
- Ulmaceae
- Unknown

B

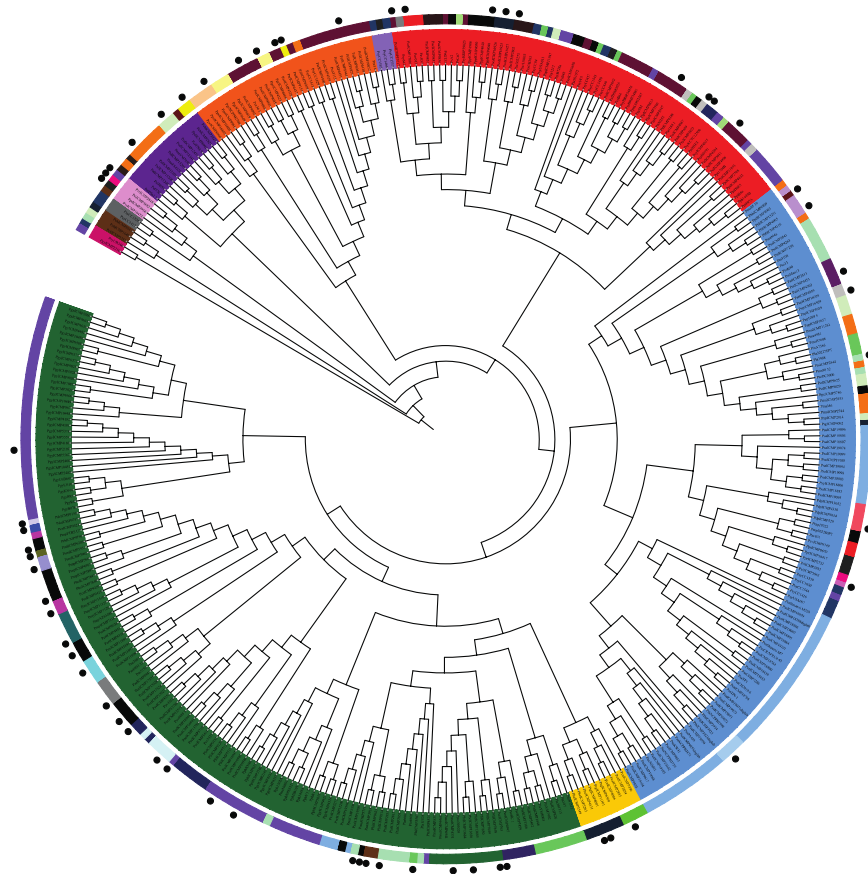

305 **Figure 2:** Core (A) and pan (B) genome phylogenies of *Pseudomonas syringae* strains. The core  
306 genome, maximum-likelihood tree was generated from a core genome alignment of the 2,457 core genes  
307 present in at least 95% of the *P. syringae* strains analyzed in this study. The pan-genome tree was  
308 generated by hierarchical clustering of the gene content in each strain using the Jaccard coefficient  
309 method for calculating the distance between strains and the Ward hierarchical clustering method for  
310 clustering. Strain phylogroups, hosts of isolation, and whether the strain is a type or pathotype strain are  
311 shown outside the tree.

312

313 **Genetic diversity:** The level of divergence between phylogroups, the extremely large accessory  
314 genome, and the diversity of phenotypes within the *P. syringae* species complex has led some to propose  
315 that individual phylogroups or even specific pathovars should be considered incipient or even fully distinct  
316 species [4]. For example, Nowell et al. [58] stated that “the three *P. syringae* phylogroups [phylogroups  
317 1, 2, and 3] are as diverged from each other as other taxa classified as separate species or even genera.”  
318 Using our expanded whole-genome dataset of *P. syringae* strains, we tested this hypothesis by  
319 quantifying the average genetic divergence between strain pairs within the same phylogroup and  
320 between strain pairs from different phylogroups. We then compared these divergence values to the  
321 pairwise divergence between three species pairs from the same genus (*Aeromonas hydrophila* –  
322 *Aeromonas salmonicida*; *Neisseria meningitides* – *Neisseria gonorrhoeae*; *Pseudomonas aeruginosa* –  
323 *Pseudomonas putida*), and one species pair from different genera (*Escherichia coli* - *Salmonella*  
324 *enterica*). For *P. syringae* strains, we calculated average synonymous ( $K_s$ ) and non-synonymous ( $K_a$ )  
325 substitution rates across the 2,457 core genes using the “SeqinR” package in R [59]. Similarly, we  
326 calculated  $K_s$  and  $K_a$  for the distinct species pairs using 3,288 core genes for *A. hydrophila* – *A.*  
327 *salmonicida*, 1,423 core genes for *N. meningitides* – *N. gonorrhoeae*, 1,971 core genes for *P. aeruginosa*  
328 – *P. putida*, and 2,688 core genes for *E. coli* – *S. enterica*.

329

330 As expected, the lowest average  $K_s$  and  $K_a$  values in *P. syringae* were obtained when comparing strains  
331 within the same phylogroup, and the second lowest values were obtained when comparing strains that  
332 were from different primary phylogroups. Comparisons between *P. syringae* strains from different  
333 secondary phylogroups and of strains from primary phylogroups with those from secondary phylogroups  
334 yielded the highest  $K_s$  and  $K_a$  values, which are comparable to those that we obtained for distinct species



335 (Figure S4). Specifically, the average  $Ka$  values within *P. syringae* phylogroups were all less than 0.02,  
336 and the average  $Ks$  values were all less than 0.20. The average  $Ka$  values between primary *P. syringae*  
337 phylogroups were between 0.02 and 0.04, and the average  $Ks$  values were between 0.30 and 0.60. With  
338 one exception, all  $Ka$  values between primary and secondary phylogroups, or between separate  
339 secondary phylogroups were greater than 0.05 and less than 0.10, while  $Ks$  values were between 0.60  
340 and 1.00. In comparison, the  $Ka$  values for distinct species were 0.06, 0.15, and 0.06 for *A. hydrophila* –  
341 *A. salmonicida*, *P. aeruginosa* – *P. putida*, and *E. coli* – *S. enterica*, respectively, and their  $Ks$  values  
342 were 0.46, 0.74, and 0.92. The *N. meningitides* – *N. gonorrhoeae* pair was an outlier in the distinct species  
343 pairs, having a  $Ka$  value of 0.02 and a  $Ks$  value of 0.14. However, these low  $Ka$  and  $Ks$  values may be  
344 misleading because of rampant recombination between the species in this genus [60, 61]. Specifically,  
345 approximately 62.70% to 98.40% of core genes in *Neisseria* are reported to be undergoing recombination  
346 and only 1% are under positive selection [62], suggesting that the low  $Ka$  values in the genus are due to  
347 the elevated recombination rates that distort the molecular clock. In summary, it is clear that most *P.*  
348 *syringae* strains within the primary phylogroups are considerably more similar than well characterized  
349 distinct species pairs. On the other hand, most secondary phylogroups are sufficiently diverged in their  
350 core genomes to potentially warrant their separation into distinct species.

351

### 352 **Ecologically Significant Genes.**

353 We explored the phylogenetic distribution and diversity of what we refer to as “ecologically significant”  
354 ortholog families to better understand how these critical gene families define the ecological niche of the  
355 species complex. Specifically, we focused on any gene family previously shown to play a direct role in  
356 microbe-host or microbe-microbe interactions, such as toxins, effectors, and resistance factors. These  
357 genes included those associated with the type III secretion system (T3SS), the type III secreted effectors  
358 (T3SEs), phytotoxins, and virulence associated proteins identified using the Virulence Factors of  
359 Pathogenic Bacteria Database (VFDB) [63].

360

361 **Type III secretion systems (T3SSs):** We investigated the phylogenetic distribution of T3SSs carried by  
362 strains in the *P. syringae* complex by searching for homologs of known proteins that constitute the  
363 structural components of different T3SSs (Figure S5). Specifically, we focused on two versions of the  
364 pathogenicity island encoding the canonical, tripartite T3SS (canonical T-PAI from *P. syringae* pv. *tomato*  
365 DC3000, alternate T-PAI from *P. viridiflava* PNA3.3a), two versions of the atypical pathogenicity island  
366 T3SS (A(A)-PAI from *P. syringae* Psy642, and A(B)-PAI from *P. syringae* PsyUB246), one version of the  
367 single pathogenicity island T3SS (S-PAI from *P. viridiflava* RMX3.1b), and one version of the Rhizobium-  
368 like pathogenicity island T3SS (R-PAI from *P. syringae* pv. *phaseolicola* 1448A) [64-72].

369  
370 The canonical T-PAI T3SS is widely distributed and is found at very high frequency among strains in the  
371 primary phylogroups, and absent from the majority of strains in the secondary phylogroups (Figure 3;  
372 Figure S6). In contrast, the alternate T-PAI T3SS is only found in three strains, *Pvr1*CMP3272 and  
373 *Pvr1*CMP11296 within phylogroup 3, and *Pvr1*CMP19473 within phylogroup 7. These strains all lack the  
374 canonical T-PAI T3SS, suggesting that the alternate T-PAI acts as a replacement T3SS in these strains.  
375 Although the broad distribution of the canonical T-PAI T3SS in *P. syringae* pathogens is widely known, it  
376 is somewhat surprising that it was also present in all strains from phylogroups 9 and 10, given that these  
377 phylogroups consist of non-agricultural, environmental strains. Interestingly, some strains in phylogroup  
378 10 have been reported to cause disease or induce a hypersensitive response (HR) in plant hosts [9], but  
379 phylogroup 9 strains have yet to be associated with any plant hosts [73]. The presence of canonical T-  
380 PAI T3SS structural genes in both of these non-agricultural phylogroups may suggest that strains in these  
381 phylogroups have the capacity to efficiently deliver effectors and cause disease in plant hosts that have  
382 yet to be examined.



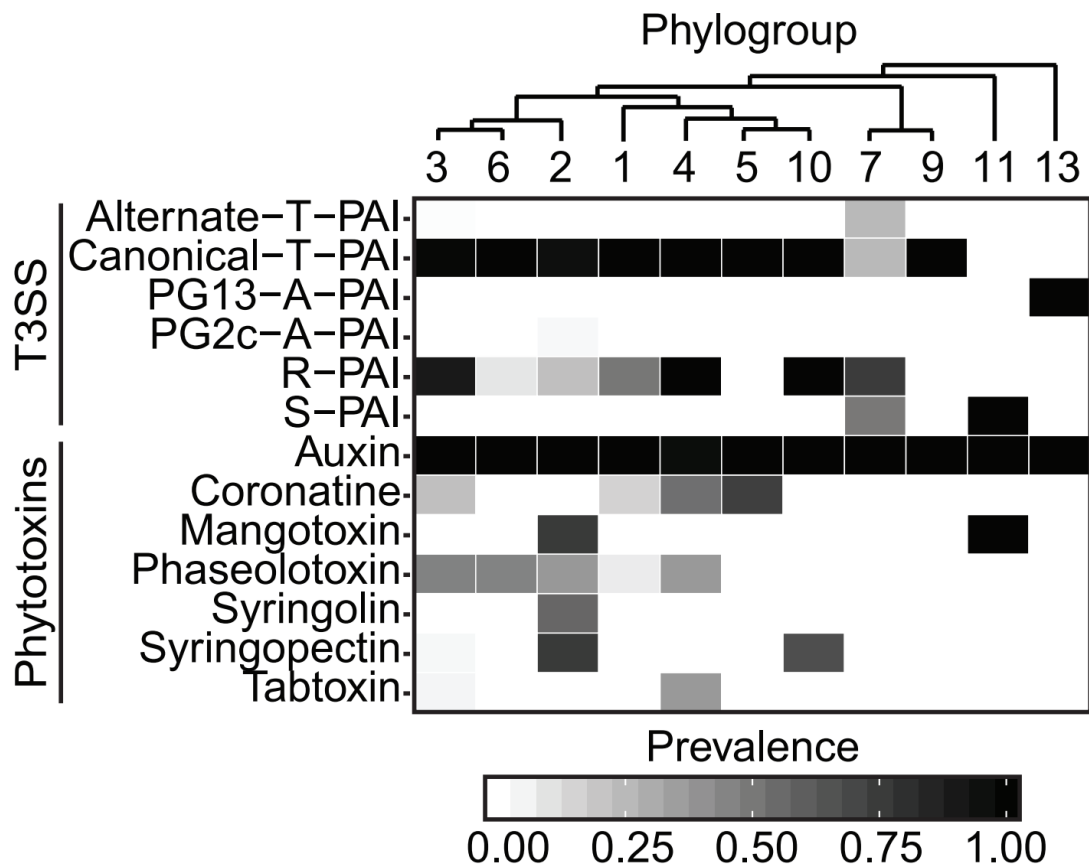

383

384 **Figure 3:** Prevalence of different forms of type III secretion systems (T3SSs) and phytotoxin biosynthesis  
 385 genes in each of the *P. syringae* phylogroups. A given T3SS was considered present if all full-length,  
 386 core, structural genes of the T3SS were present in the genome, while phytotoxins were considered  
 387 present if more than half of the biosynthesis genes for a given phytotoxin were present in the genome.

388

389 Unlike the T-PAI T3SS, the A-PAI and S-PAI T3SSs are only present in a small subset of the *P. syringae*  
 390 strains sequenced in this study. The only two homologs for the A(A)-PAI T3SS are found in phylogroup  
 391 2c, where they likely function as a replacement for the canonical T-PAI T3SS. Strains from phylogroup  
 392 2c have primarily been isolated from phyllosphere of grasses and have been widely described as non-  
 393 pathogenic. However, past studies have suggested that some of these strains can efficiently deliver  
 394 effectors into host cells and induce a hypersensitive response [74]. Two closely related A(B)-PAI T3SS  
 395 homologs were also found in phylogroup 13. However, the A(B)-PAI T3SS in these strains is located in  
 396 a different genomic region from the A(A)-PAI T3SS in strains from phylogroup 2c. Specifically, strains  
 397 from phylogroup 2c contain the A-PAI T3SS between a sodium transporter and a recombination-  
 398 associated protein [71], while in phylogroup 13 the A-PAI T3SS is located between a transcriptional

399 regulator and a lytic murein transglycosylase (Figure S5). The lack of synteny between the location of  
400 the A-PAI T3SS in these two phylogroups suggests that they were independently acquired via horizontal  
401 gene transfer [69]. The S-PAI T3SS was also only identified in a small subset of the strains that we  
402 sequenced in this study, three of which are part of phylogroup 11, where they are the only T3SS in the  
403 genome, and two of which are part of phylogroup 7, where they also contain an R-PAI T3SS (Figure 3;  
404 Figure S6). Despite lacking the exchangeable and conserved effector loci (EEL and CEL, respectively)  
405 regions of the canonical T-PAI T3SS, and containing a 10kb insertion in the middle of the Hrc/Hrp cluster  
406 [67], we expect that these strains will be capable of successfully delivering effectors into some plant  
407 hosts.

408  
409 The R-PAI T3SS, which closely resembles the T3SS found in *Rhizobium* species [72], is distinguished  
410 from other T3SS families based largely on the splitting of the *hrcC* gene, which codes for an outer  
411 membrane secretin protein [72]. Specifically, the *hrcC* gene is typically split into the *hrcC1* and *hrcC2*  
412 genes, separated by TPR domain (Figure S5), and in some strains, the *hrcC2* gene is split again into two  
413 additional fragments. The R-PAI T3SS is found in a large fraction of *P. syringae* strains from phylogroups  
414 1, 2, 3, 4, 7, and 10 (Figure 3; Figure S6), but it is always present in concert with at least one other type  
415 of T3SS in *P. syringae* strains. All of these strains contain the characteristic split in the *hrcC* gene, but  
416 only seven strains, all from phylogroup 3, also contain a second split in the *hrcC2* gene. The similarity in  
417 GC-content between the *P. syringae* R-PAI T3SS genes and the rest of the *P. syringae* genome [72], the  
418 broad distribution of the R-PAI T3SS across *P. syringae* strains (Figure S6), and the ability of R-PAI HrcV  
419 protein phylogeny to effectively resolve distinct phylogroups (Figure S7) suggest that the R-PAI T3SS  
420 was likely present in the most recent common ancestor of the *P. syringae* complex. However, there is  
421 some disagreement between the inter-phylogroup relationships revealed by the HrcV protein tree and  
422 the core genome tree, with phylogroup 2 clustering with phylogroups 4 and 10 instead of phylogroup 3.  
423 This suggests that the R-PAI T3SS has also been transferred horizontally between phylogroups during  
424 the evolutionary history of the *P. syringae* species complex. From an evolutionary perspective, the

425 presence of the R-PAI T3SS in such a large number of *P. syringae* lineages may suggest its selective  
426 benefit in nature [5], but the exact function of the R-PAI T3SS has yet to be investigated.

427

428 **Type III secreted effector proteins (T3SEs):** The role of T3SSs is to deliver T3SEs into host plant cells  
429 to subvert the host immune response and promote bacterial growth. Therefore, we also explored the  
430 frequency and distribution of known T3SE families across *P. syringae* strains by blasting experimentally  
431 validated and predicted T3SEs against our *P. syringae* genome assemblies [75, 76]. We also attempted  
432 to identify novel T3SE candidates by searching for the universal N-terminal secretion signal and the *hrp*-  
433 box motif.

434

435 The number of known T3SE families per strain varied dramatically, from a minimum of four in strains from  
436 phylogroup 9, to a maximum of nearly 50 in some strains from phylogroup 1 (Figure 4, Figures S8). By  
437 analyzing the distribution of each effector family across *P. syringae* strains in the primary phylogroups  
438 (Figure 4), we identified three core T3SEs (*avrE1*, *hopAA1*, *hopAJ2*) that were present in some form (full-  
439 length ORF or truncated ORFs) in more than 95% of the primary phylogroup strains. Two of these core  
440 T3SEs (*avrE1* and *hopAA1*) are found in the CEL of the canonical T-PAI T3SS. In addition, a number of  
441 other T3SEs, including a third T3SE from the CEL (*hopM1*), are also broadly distributed across *P.*  
442 *syringae* phylogroups (Figure 4), but did not pass the core genome threshold of 95%. Interestingly, in  
443 contrast to the other T3SEs in the CEL, *hopN1* is not broadly distributed and is only found in phylogroup  
444 1 strains.

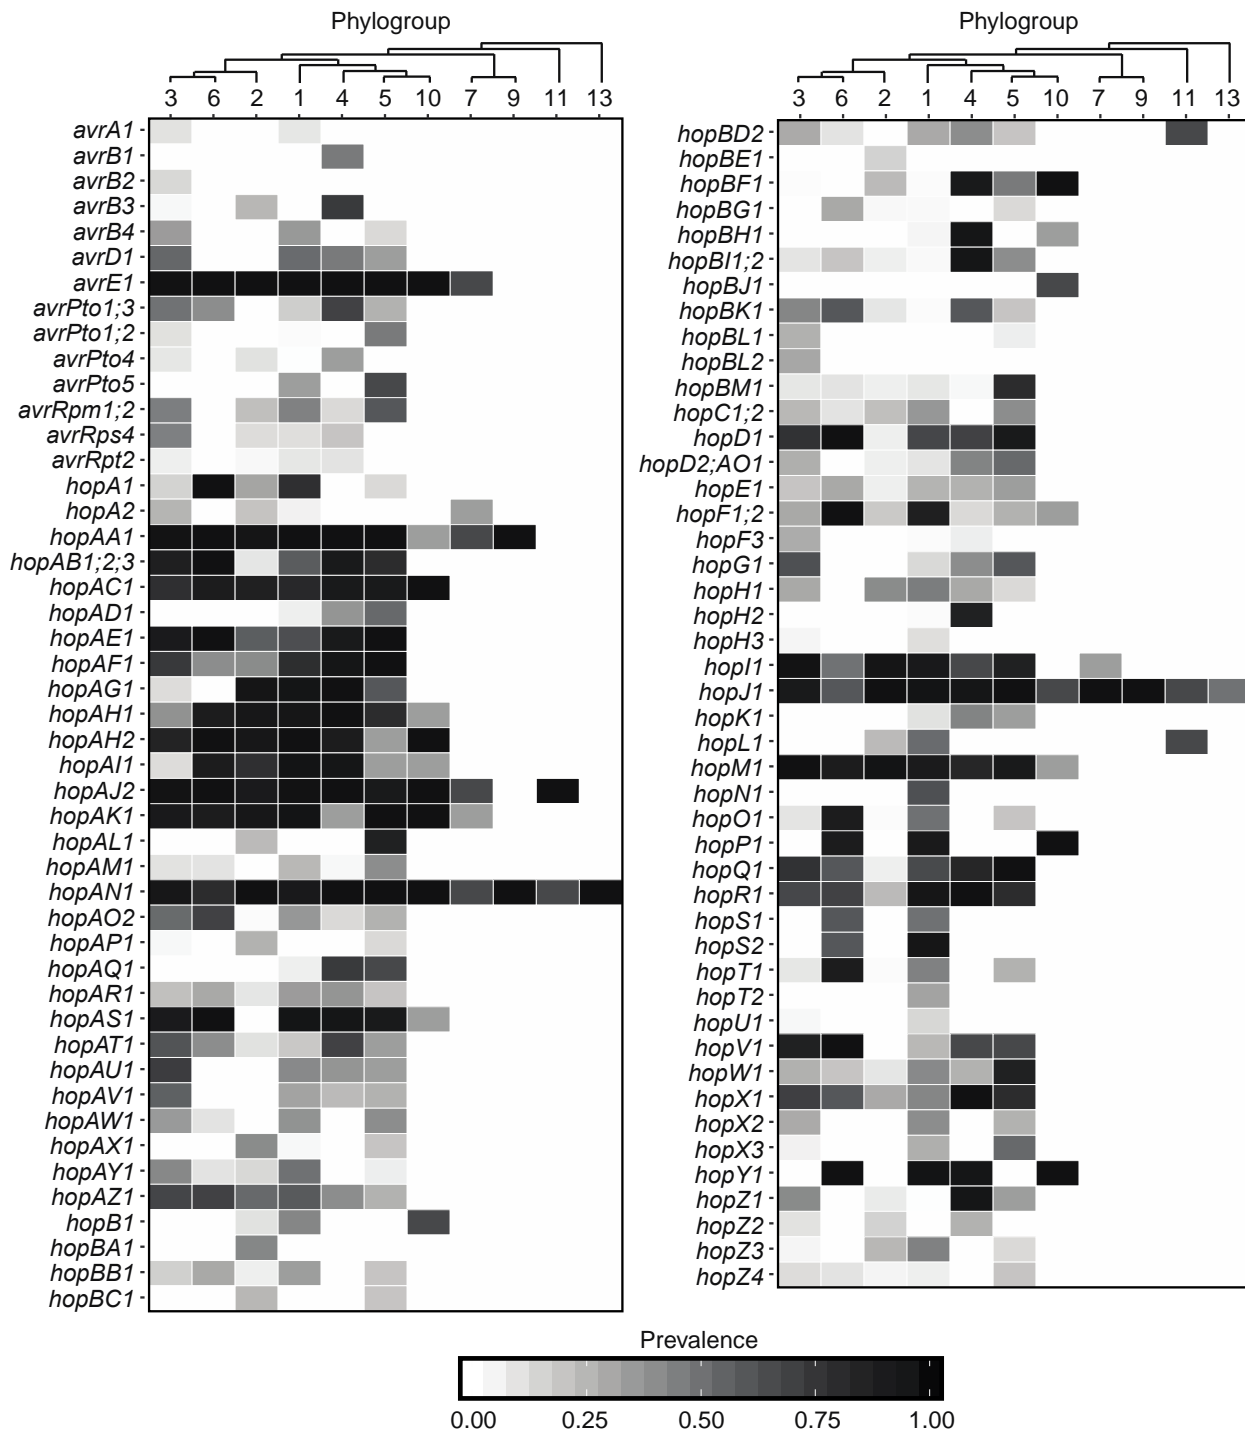

445

446 **Figure 4:** Prevalence of all known type III secreted effectors (T3SEs) in each of the *P. syringae*  
 447 phylogroups analyzed in this study. T3SEs were identified using a tblastn of 1,215 experimentally verified  
 448 or computationally predicted effector sequences from the BEAN 2.0 database, and were considered  
 449 present if a significant hit was found in the genome (E-Value < 1<sup>-5</sup>). Grey scaling indicates the prevalence  
 450 of each T3SE family within the respective phylogroups.

451

452 The remaining T3SEs are patchily distributed across the phylogenetic tree and a hierarchical clustering  
453 analysis of the total effector content of individual *P. syringae* strains reveals that strains from the same  
454 phylogroup can differ substantially in their T3SE content (Figure S8A). Specifically, in the T3SE content  
455 tree, phylogroup 6 strains are clustered with phylogroup 1 instead of phylogroup 3. Phylogroup 3 and  
456 phylogroup 5 strains are split in the T3SE content tree. Specifically, some phylogroup 3 strains cluster  
457 with phylogroup 1 and others cluster with phylogroup 2, while distinct clusters of phylogroup 5 strains are  
458 also found on distant regions on the T3SE content tree. Finally, while all secondary phylogroups strains,  
459 which contain considerably fewer T3SEs than primary phylogroup strains, cluster separately from primary  
460 phylogroups in the T3SE content tree, these phylogroups are often not resolved based on their T3SE  
461 contents and include the two low T3SE content strains from phylogroup 2c.

462

463 We also performed a separate analysis focusing only on variation in the exchangeable effector locus  
464 (EEL) in each of our *P. syringae* strains, which is known to be located between the *tRNA-Leu* and *hrpK1*  
465 genes. An EEL region was identified in all 380 primary phylogroup strains with the exception of the two  
466 strains in phylogroup 2c, but was only identified in four out of the eleven secondary phylogroup strains.  
467 As expected, the content of the EEL region was highly variable across strains, and a hierarchical  
468 clustering analysis of the EEL content revealed that the content of these regions does a poor job of  
469 resolving even primary phylogroup relationships (Figure S8B). For this analysis, we only included the 211  
470 *P. syringae* strains that contained intact EEL on a single contig. Overall, the patchy distribution of T3SEs  
471 across the *P. syringae* phylogenetic tree, particularly those in the EEL, demonstrates that T3SEs are  
472 highly dynamic genes that are under frequent selection for gene gain or loss to favor adaptation to specific  
473 plant hosts and may undergo increased rates of horizontal gene transfer.

474

475 In addition to the known effector families, 6,264 additional protein sequences from the *P. syringae* species  
476 complex contained a characteristic T3SE N-terminal secretion signal and an upstream *hrp*-box promoter.  
477 We re-annotated these protein sequences using the Gene Ontology and Uniprot databases (Table S1),  
478 and found that 5,325 (85.01%) of these putative effectors were either known T3SEs that were missed in

479 our blast similarity analysis or were sequences associated with the T3SS. The remaining 939 proteins,  
480 which were annotated with a diverse array of functions relating to metabolic processes, protein transport,  
481 signal transduction, peptidase activity, and pathogenesis, are candidates for novel T3SEs. Further  
482 computational and experimental verification of these candidate T3SEs will ultimately be required to  
483 determine if these are in fact T3SEs. However, we recommend that the 458 putative T3SEs with a *hrp*-  
484 box between 15 and 265 base-pairs from their start codons be prioritized for these studies, as has been  
485 suggested previously [77-79].

486

487 **Phytotoxins:** Phytotoxins are secondary metabolites that play a non-host-specific role in pathogenesis  
488 as well as having generalized antibacterial and antifungal properties [80]. We studied the distribution of  
489 seven well-known phytotoxin biosynthesis pathways in *P. syringae*, including auxin, mangotoxin,  
490 syringopeptin, syringolin, tabtoxin, phaseolotoxin, and coronatine by using a protein blast search of their  
491 known biosynthesis genes (Figure 3; Figure S9). Specifically, we considered phytotoxin pathways  
492 present if we identified more than half of the proteins involved in the biosynthetic pathway in a strain.  
493 Auxin appears to be the only broadly distributed phytotoxin, as genes for auxin production were found in  
494 all strains of *P. syringae* species complex, with the exception of PzilCMP8959 from phylogroup 4. In  
495 contrast, mangotoxin is restricted to strains from phylogroups 2 and 11. Both syringopeptin and syringolin  
496 are also primarily restricted to strains from phylogroup 2, while tabtoxin is restricted to a small number of  
497 strains in phylogroups 3 and 4. Genes for the production of phaseolotoxin and coronatine are found in a  
498 larger proportion of phylogroups, but are still missing from many *P. syringae* strains. Overall, the majority  
499 of *P. syringae* strains only possess genes necessary to produce one or two phytotoxins; however, strains  
500 from phylogroup 2, and to a lesser extent phylogroup 4, can synthesize three or even four phytotoxins.  
501 Interestingly, phylogroup 2 strains harbor fewer T3SE genes, which suggests that phylogroups 2 strains  
502 may have evolved a unique strategy to interact with their hosts or associated microbiomes that relies  
503 more on generalized toxins as opposed to specialized T3SEs [18, 81-83].

504

505 **Miscellaneous virulence-associated systems:** Finally, we performed a search for all putative virulence  
506 factors in *P. syringae* by scanning the proteome of each strain using a BLAST search against the  
507 Virulence Factors of Pathogenic Bacteria Database (VFDB) [63]. 885 out of 17,807 orthologous protein  
508 families that were present in at least five *P. syringae* strains (4.97%) were identified as predicted virulence  
509 factors and were significantly associated with 36 different biological process (FDR p-value < 0.05) [84,  
510 85]. These pathways included a high frequency of families involved in cellular localization, pathogenesis,  
511 flagellar movement, protein secretion, regulation of transport, siderophore biosynthesis, secondary  
512 metabolite biosynthesis, and other metabolic processes (Table S2).

513

#### 514 **Evolutionarily Significant Genes.**

515 We explored the phylogenetic distribution and diversity of what we refer to as “evolutionarily significant”  
516 ortholog families to identify which gene families are significantly impacted by natural selection and  
517 recombination. We focused on those gene families showing genetic signatures consistent with positive  
518 selection and/or recombination. We were particularly interested in identifying loci which recombine  
519 between distinct phylogroups since these have the potential to reinforce the genetic cohesion in this  
520 diverse species complex.

521

522 **Positive selection:** We performed a codon-level analysis of natural selection using FUBAR [86] on all  
523 17,807 ortholog families that were present in at least five *P. syringae* strains to identify families with  
524 significant evidence of positive selection at one or more residues (Bayes Empirical Bayes P-Value  $\geq 0.9$ ;  
525  $dN/dS > 1$ ). Recombination was accounted for in this analysis by using a partitioned sequence alignment  
526 and the corresponding phylogenetic tree from the output of GARD (see below), which identified 1,649  
527 ortholog families with signatures of homologous recombination ( $P \leq 0.05$ ). A total of 3,888 ortholog  
528 families had significant evidence of positive selection at one or more codons (21.83%), with 931 of these  
529 families (23.95%) coming from the core genome and 2,957 (76.05%) coming from the accessory genome.  
530 Interestingly, this suggests that there is a significant bias for genes in the core genome to contain  
531 individual sites under positive selection (Chi-squared test;  $\chi^2 = 5670.60$ ,  $df = 1$ ,  $p < 0.0001$ ), despite the



532 fact that overall these genes are constrained by purifying selection and conserved across the *P. syringae*  
533 species complex.

534

535 **Recombination:** We searched for different signatures of homologous recombination in the 17,807  
536 ortholog families that were present in at least five *P. syringae* strains using four programs: GARD [87],  
537 CONSEL [88], GENECONV [89], and PHIPACK [90]. These four methods use different underlying  
538 principles to identify recombination. GARD uses genetic algorithms to assess phylogenetic incongruence  
539 between sequence segments. CONSEL employs the Shimodaira-Hasegawa test to assess the likelihood  
540 of a dataset given one or more trees. GENECONV looks for imbalances in the distribution of  
541 polymorphism across a sequence (i.e. clusters of polymorphisms). PHIPACK calculates a pairwise  
542 homoplasy index (PHI statistic) based on the classic four gamete test [91] that assesses the minimum  
543 number of homoplasies needed to account for the linkage between two sites. Our analysis identified a  
544 total of 11,533 (64.77%) ortholog families with signatures of homologous recombination in at least one of  
545 these analyses. Specifically, GARD, CONSEL, GENECONV, and PHIPACK identified 1,616, 1,681,  
546 4,433, and 7,379 ortholog families respectively (Bonferroni corrected  $P \leq 0.05$ ), with relatively little  
547 overlap between these packages (Figure S10). Not surprisingly, those ortholog families that displayed  
548 evidence of recombination had significantly greater average lengths ( $1010.09 \text{ bps} \pm 8.70 \text{ (SEM)}$ ) than  
549 those that did not display evidence of recombination ( $683.49 \text{ bps} \pm 10.55 \text{ (SEM)}$ ) (Welch's Two Sample  
550 T-Test;  $t = 23.87$ ,  $df = 14,148$ ,  $p < 0.0001$ ). This is consistent with the expectation that shorter genes are  
551 less likely to be involved in recombination because of their decreased target size and/or the decreased  
552 power of analyses of recombination on shorter genes [90, 92, 93]. The GENECONV analysis additionally  
553 classifies recombining ortholog families into intra- and inter-phylogroups recombination events,  
554 demonstrating that ortholog families that recombine within phylogroup (2,476; 55.85%) are more common  
555 than ortholog families that recombine between phylogroups (1,957; 44.15%).

556

557 Using all 11,533 ortholog families with signatures of homologous recombination, we first asked whether  
558 the well-established negative correlation between the frequency of homologous recombination and



559 evolutionary rate could explain the reduced recombination rate between phylogroups [94, 95]. Given the  
560 wide range in strain numbers and overall diversity among phylogroups, we normalized the number of  
561 recombination events occurring between phylogroups in a number of different ways, including:  
562 recombination events per gene per strain, events per gene adjusted by branch length, events per strain  
563 adjusted by branch length, and others. The general pattern was the same regardless of the means of  
564 normalization, so we report here the analysis after normalizing recombination events per strain adjusted  
565 by branch length. Our analysis revealed a significant negative log-linear relationship between normalized  
566 recombination frequency and non-synonymous substitution rates ( $K_a$ ) for strains within the same  
567 phylogroup and between different primary phylogroups, as predicted (Linear regression;  $F = 49.51$ ,  $df =$   
568  $30$ ,  $p < 0.0001$ ,  $r^2 = 0.6227$ ) (Figure 5A). A significant negative log-linear relationship was also observed  
569 between normalized recombination frequency and synonymous substitution rates ( $K_s$ ) for the same strain  
570 pairs (Linear regression;  $F = 54.53$ ,  $df = 30$ ,  $p < 0.0001$ ,  $r^2 = 0.6451$ ) (Figure 5B). In contrast,  
571 recombination events between strains from different secondary phylogroups and between strains in  
572 primary versus secondary phylogroups displayed a significant negative log-linear relationship between  
573 normalized recombination frequency and  $K_a$  (Linear regression;  $F = 10.58$ ,  $df = 32$ ,  $p = 0.0027$ ,  $r^2 =$   
574  $0.2485$ ) (Figure 5A). Again, this relationship was supported by comparisons of normalized recombination  
575 frequency with  $K_s$  for the same strain pairs (Linear regression;  $F = 11.40$ ,  $df = 32$ ,  $p = 0.0019$ ,  $r^2 = 0.2627$ )  
576 (Figure 5B). One of the reasons why we might not find a negative relationship between recombination  
577 rate and evolutionary rate between more distantly related strains is that other factors, like environmental  
578 isolation, are confounding recombination biases that are associated with sequence similarity.

579

580 We then applied hierarchical clustering analysis to assess the relationship between phylogroups based  
581 on the frequency of recombination between them (Figure 5C) and identified two distinct clusters. One  
582 cluster contains all but one of the primary phylogroups, and therefore includes the vast majority of strains  
583 that have been isolated from agricultural environments (phylogroups 1, 2, 3, 4, 5, and 6). The second  
584 clade contains all of the secondary phylogroups, and therefore includes many strains with environmental  
585 origins (phylogroups 7, 9, 10, 11, and 13). The only exception to a clean split between primary and

586 secondary phylogroups is phylogroup 10, which clusters with the primary phylogroups in the core genome  
587 phylogeny, but clusters with the secondary phylogroups in this analysis. This finding is interesting since  
588 two of the three strains from phylogroup 10 in our collection come from environmental sources, while the  
589 third was isolated off a non-diseased plant. These results suggest that ecological differences may also  
590 play a role in establishing recombination barriers within the *P. syringae* species complex [96]. While these  
591 relationships are robust to different methods of normalizing the number of recombination events, it is  
592 important to note that we also have much better sampling of nearly all the primary phylogroups relative  
593 to the secondary phylogroups, and therefore, much more confidence in the overall patterns of diversity  
594 found in these groups.

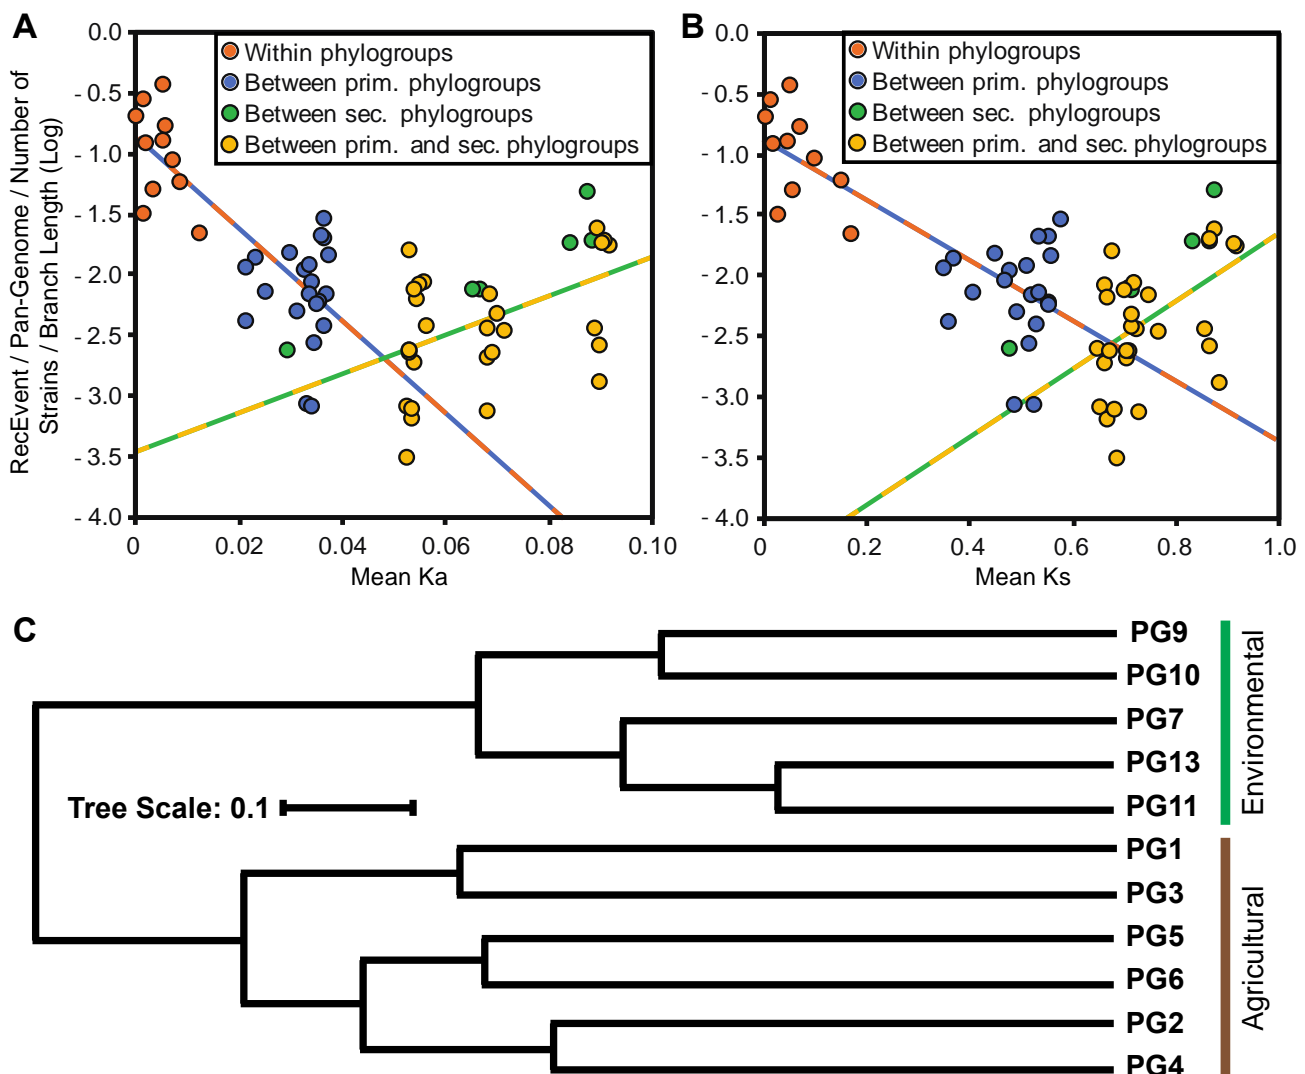

595

596 **Figure 5:** Recombination analysis between *P. syringae* strains from different phylogroups (PGs).  
597 Pairwise phylogroup recombination events were normalized based on the pan-genome size, the number

598 of strains, and the total branch length for each phylogroups pair. A) Regression analysis of recombination  
599 rates and corresponding non-synonymous substitution rates ( $K_a$ ). There is a significant negative log  
600 linear relationship between recombination rates and  $K_a$  for strains within the same phylogroup and  
601 between different primary phylogroups ( $F = 49.51$ ,  $df = 30$ ,  $p < 0.0001$ ,  $r^2 = 0.6227$ ); however, the inverse  
602 relationship exists when comparing more distantly related strains from different secondary phylogroups  
603 and strains from primary and secondary phylogroups ( $F = 10.58$ ,  $df = 32$ ,  $p = 0.0027$ ,  $r^2 = 0.2485$ ) B)  
604 Regression analysis of recombination rates and corresponding synonymous substitution rates ( $K_s$ ). The  
605 same significant negative ( $F = 54.53$ ,  $df = 30$ ,  $p < 0.0001$ ,  $r^2 = 0.6451$ ) and positive ( $F = 11.40$ ,  $df = 32$ ,  $p$   
606  $= 0.0019$ ,  $r^2 = 0.2627$ ) log linear relationships were observed for strains within the same phylogroup and  
607 between different primary phylogroups, and more distantly related strains from different secondary  
608 phylogroups and strains from primary and secondary phylogroups, respectively C) Hierarchical clustering  
609 of homologous recombination frequency between phylogroups of the *P. syringae* species complex.  
610 Pairwise distances between phylogroups were calculated using the Jaccard coefficient method, based  
611 on the normalized pairwise recombination rates. Note that phylogroup 10 (PG10) is a primary phylogroup  
612 that is more closely related to phylogroups 1, 2, 3, 4, 5, and 6. Agricultural vs. Environmental labeling  
613 indicates that the bulk of the strains in these phylogroups come from these sources.

614

615 Previous studies have also reported significant horizontal gene transfer (HGT) between the *P. syringae*  
616 complex and other bacterial species [58]. Therefore, we performed a blastp search for all protein  
617 sequences in all 391 *P. syringae* genomes (2,176,750 sequences) against the NCBI-GenBank non-  
618 redundant protein database to identify candidate genes that have recently undergone cross-species  
619 horizontal transfer. Specifically, we considered any protein sequence with a significant match from  
620 another species in the first three blast hits to be a candidate for recent cross-species horizontal transfer.  
621 This allows us to in minimize false negatives resulting from the best matches being from the query strain  
622 or other closely related *P. syringae* strains that are present in the database. Based on these criteria, we  
623 identified 31,410 (1.44%) candidate horizontally transferred genes, and another 55,765 (2.56%) genes  
624 with no similarity matches in the non-redundant database. The most common genera involved in the  
625 putative horizontal transfer events include *Pseudomonas*, *Xanthomonas*, *Burkholderia*, *Klebsiella*,  
626 *Enterobacter*, *Serratia*, *Legionella*, *Pectobacterium*, *Pantoea*, *Escherichia*, *Salmonella*, *Ralstonia*,  
627 *Azotobacter*, *Achromobacter*, *Erwinia*, *Rhizobium*, *Bordetella*, and *Stenotrophomonas* (Figure S11A).  
628 After normalizing for the number of strains in each phylogroup, it appears as though three non-  
629 agricultural, environmentally isolated phylogroups (in rank order: phylogroups 13, 7, and 11) undergo the  
630 most HGT (Figure S11B). This finding suggests that environmental *P. syringae* strains may retain more  
631 loci obtained via HGT with other bacterial species because of increased opportunities to interact with a  
632 more diverse community of microbes, many of which could be unrelated pathogenic strains.

633

634 **Maintenance of Genetic Cohesion.**

635 In clonally reproducing bacteria, recombination is the only evolutionary process that can counter lineage  
636 diversification driven by mutation, genetic drift, and selection, thereby maintaining the overall genetic  
637 cohesion of the species. As discussed above, inter-phylogroup recombination occurs less frequently than  
638 intra-phylogroup recombination. This relationship is predicted based on the well-established log-linear  
639 relationship between sexual isolation (i.e. inverse of the recombination rate) and the level of sequence  
640 divergence due to increased difficulty of forming a DNA heterduplex as sequence divergence increases  
641 [94]. Despite this, we did find evidence that a considerable proportion of ortholog families participate in  
642 inter-phylogroup recombination, which could be an important force for maintaining genetic cohesion in  
643 the *P. syringae* species complex. We therefore wished to know the relationship between inter-phylogroup  
644 recombination and ecologically and evolutionarily significant genetic loci. Specifically, we examined  
645 whether inter-phylogroup recombination disproportionately occurred at these critical loci. To study this  
646 relationship, we classified all 17,807 orthologous gene families present in at least five *P. syringae* strains  
647 based on whether they display evidence of inter-phylogroup recombination (GENECONV), whether they  
648 were identified as ecologically significant (VFDB), and whether they were identified as evolutionarily  
649 significant (FUBAR positive selection analysis).

650

651 We first asked if there was a higher frequency of ecologically significant, virulence-associated loci among  
652 the evolutionarily significant, positively selected loci (Figure 6A). 23.50% of the 885 virulence-associated  
653 ortholog families were found to have a signal of positive selection compared to 21.75% of the 16,922  
654 non-virulence-associated ortholog families (Chi-squared proportions test;  $\chi^2 = 1.58$ ,  $df = 1$ ,  $p = 0.2081$ ),  
655 indicating that positive selection is not more likely to operate on virulence-associated loci in general.  
656 Second, we asked if inter-phylogroup recombination disproportionately acted on virulence-associated  
657 ortholog families (Figure 6B). 15.25% of the 885 virulence-associated families were found to recombine  
658 between phylogroups compared to only 10.77% of the 16,922 non-virulence-associated families (Chi-  
659 squared proportions test;  $\chi^2 = 19.08$ ,  $df = 1$ ,  $p < 0.0001$ ), indicating that virulence-associated loci are

660 significantly more likely to recombine between phylogroups than non-virulence-associated loci. Third, we  
661 asked if inter-phylogroup recombination disproportionately acted on positively selected ortholog families  
662 (Figure 6C). 13.32% of the 3,888 positively selected families were found to recombine between  
663 phylogroups compared to only 10.34% of the 13,919 non-positively selected families (Chi-squared  
664 proportions test;  $\chi^2 = 51.40$ ,  $df = 1$ ,  $p < 0.0001$ ), indicating that positively selected loci are also significantly  
665 more likely to recombine between phylogroups than non-positively selected loci. Fourth, we asked if inter-  
666 phylogroup recombination disproportionately acted on the small set of loci that are both positively  
667 selected and virulence-associated (Supplemental Dataset S5). 20.19% of the 208 positively selected,  
668 virulence-associated ortholog families were found to recombine between phylogroups as opposed to  
669 10.88% of the 17,599 other ortholog families (Chi-squared proportions test;  $\chi^2 = 17.86$ ,  $df = 1$ ,  $p < 0.0001$ ).  
670 This set of orthologs include some of the most widely studied loci associated with host-microbe  
671 interactions, including numerous T3SEs, components of the flagellar system (*fliC*, *flg22*), phytotoxins,  
672 chemotaxis proteins, and an alginate regulatory protein (Supplemental Dataset 5). We also performed  
673 this same suite of analyses focusing exclusively on primary phylogroups (1, 2, 3, 4, 5, and 6) to examine  
674 the strength of recombination to maintain genetic cohesion in this cluster of more closely related *P.*  
675 *syringae* strains. Indeed, although there is still no significant correlation between ecologically and  
676 evolutionarily significant genes in the primary phylogroups, the frequency with which both ecologically  
677 and evolutionarily significant genes are transferred between primary phylogroups is even greater than it  
678 was when we considered all phylogroups (Figure S12, Table S3).

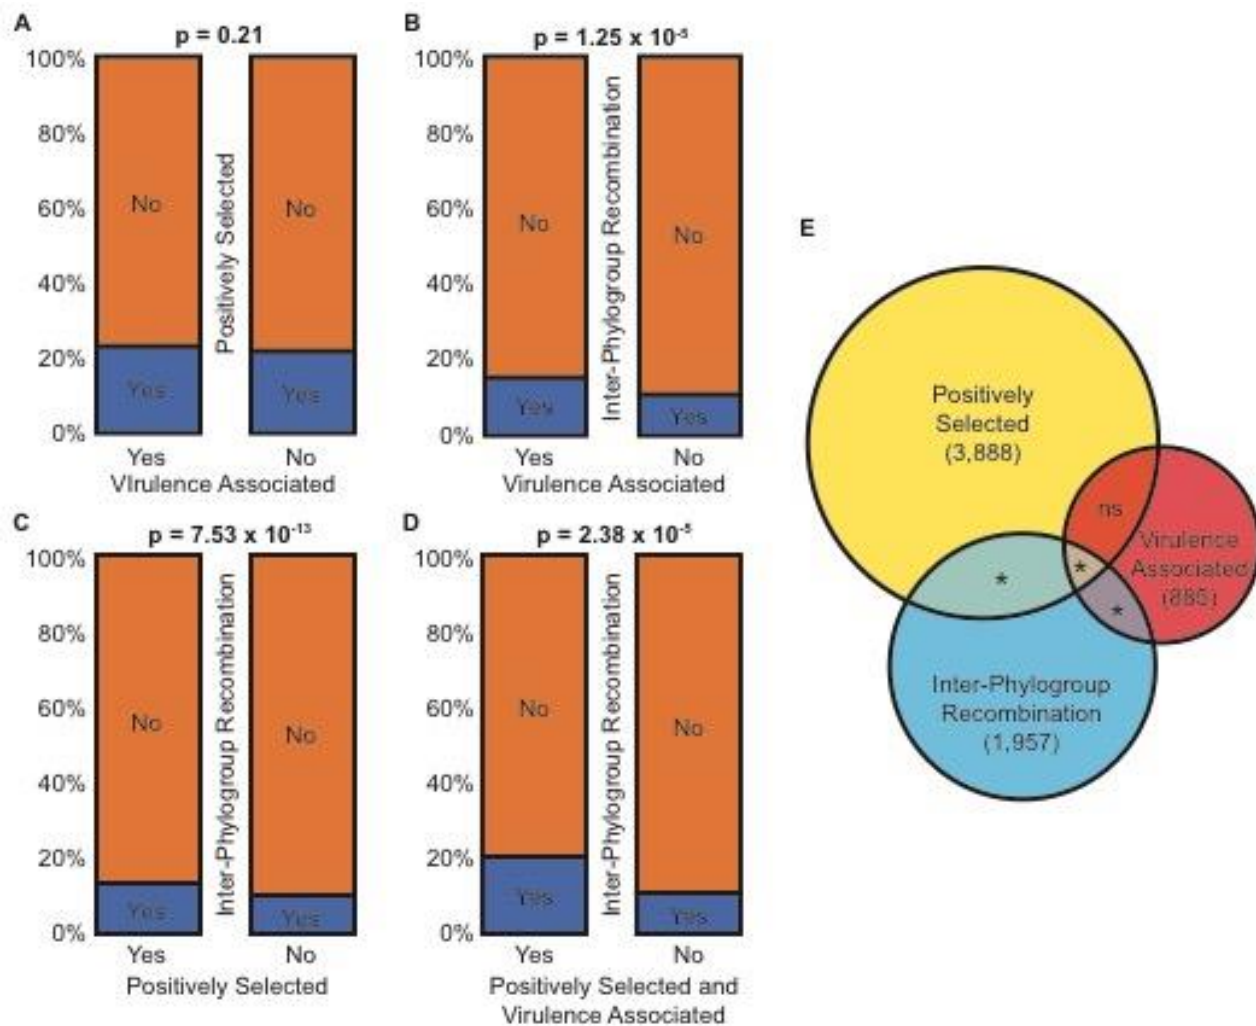

679

680 **Figure 6:** Relationships between inter-phylogroup recombination, virulence-association (“ecologically  
 681 significant” loci), and positive selection (“evolutionarily significant” loci) for genes in *P. syringae* based on  
 682 chi-squared proportions tests. There is no significant association between positively selected and  
 683 virulence-associated genes (A). However, there is a significant positive association between gene  
 684 families that have undergone inter-phylogroup recombination with virulence-associated gene families (B),  
 685 positively selected gene families (C), and the small collection of gene families that are both virulence-  
 686 associated and positively selected (D). The Venn diagram (E) depicts the number gene families  
 687 undergoing inter-phylogroup recombination, the number of gene families that are virulence associated,  
 688 and the number of gene families that are positively selected, as well as the significance of the overlap  
 689 between these families.

690

691 Taken together, these results demonstrate that inter-phylogroup recombination occurs disproportionately  
 692 in ecologically relevant (virulence-associated) and evolutionarily significant (positively selected) ortholog  
 693 families in *P. syringae*, so while inter-phylogroup recombination may be less common than intra-  
 694 phylogroup recombination, it plays a critical role in circulating genes important for maintaining the



695 ecological niche of the species complex, and thus maintain the genetic cohesion on between all *P.*  
696 *syringae* strains.

697

## 698 **DISCUSSION**

699

700 In this study, we analyzed the genomes of a diverse collection of 391 *P. syringae* strains representing 11  
701 of the 13 *P. syringae* phylogroups to gain insight into the genome dynamics and evolutionary history of  
702 the *P. syringae* species complex. We reveal that *P. syringae* has a large and diverse pan-genome that  
703 will likely continue to expand with the sampling of more strains. We also demonstrate strong concordance  
704 at the phylogroup level between the refined core genome and gene content trees of *P. syringae* strains  
705 with a few exceptions, suggesting that while horizontal gene transfer between *P. syringae* phylogroups  
706 is typically insufficient to distort the phylogenetic signal from vertical inheritance of gene content, there  
707 are cases where it has distorted relationship among subgroups. Furthermore, by investigating the  
708 distribution of ecologically and evolutionary relevant loci in the *P. syringae* species complex and the rates  
709 of intra-and inter-phylogroup recombination of these genes, we also demonstrate that despite its relative  
710 rarity, inter-phylogroup recombination is a critical cohesive force that disproportionately facilitates the  
711 spread of ecologically and evolutionarily significant loci across *P. syringae* phylogroups.

712

### 713 **Core and Accessory Genetic Content in the *P. syringae* Pan-Genome**

714 The *P. syringae* pan-genome is vast and extremely diverse, comprising a total of 77,728 ortholog families.  
715 Yet, very few of these ortholog families are present at high frequency in the *P. syringae* species complex.  
716 A rarefaction analysis demonstrates that the composition and size of core genome stabilizes after  
717 sampling approximately 50 strains at ~2500 genes. This is slightly smaller than estimates from three prior  
718 studies that identified core genome sizes of 3,397 [18], 3,364 [58], and 3,157 [97]. However, these prior  
719 studies were mostly restricted to the primary phylogroups, and only the Mott *et al.* study [97] was  
720 performed with more than 50 strains. The *P. syringae* core genome size is also comparable to the core  
721 genome sizes of other pathogenic Proteobacteria, including: *P. aeruginosa* (2,503) [98], *Erwinia*

722 *amylovora* (3,414) [99], and *Ralstonia solanacearum* (2,543) [100]. This raises the possibility that different  
723 pathogenic bacteria may have similar core metabolic requirements; however, the extent to which the core  
724 genome content is conserved across species will require further investigation.

725

726 Our analysis further clarifies and expands our understanding of the highly dynamic nature of the *P.*  
727 *syringae* accessory genome. The gene family size distributions (Figure S3) suggest that a relatively small  
728 number of gene families are found in more than ten strains (16.36%), while the majority of families  
729 (62.58%) are only found in a single strain. The pan-genome rarefaction curve (Figure 1B) demonstrates  
730 that the pan-genome of *P. syringae* remains open after sampling 391 strains, and will therefore continue  
731 to increase in size as more diverse *P. syringae* strains are added to the analysis at a rate of ~193 new  
732 ortholog families for each new strain analyzed. The tendency of gene families to be present in only a  
733 single strain is often attributed to a species' ability to acquire novel DNA through horizontal gene transfer  
734 [101]. However, the ubiquitous distribution of *P. syringae* strains across the globe is likely also a key  
735 contributor to the diverse gene content of different strains, as many strain-specific genes may be under  
736 selection only in specific environments. A large number of the strain-specific gene families that were  
737 identified in this study are annotated as hypotheticals with no similar sequences in the sequence  
738 databases, and thus may represent a diverse collection of niche specific genes in *P. syringae* that are  
739 entirely unexplored. However, as we have already acknowledged, it is also important to recognize that  
740 some of these strain specific genes may be artefactual due to sequencing and assembly errors [56].  
741 Furthermore, although the *P. syringae* pan-genome remains open, we believe we have sampled the  
742 majority of higher-frequency genes since our rarefaction analysis on non-singleton orthologs did plateau  
743 (Figure 1B).

744

#### 745 **Phylogenetic Relationships and Diversity Among *P. syringae* Strains**

746 Investigating the relationship between core genome and gene content trees can shed important insight  
747 into the lifestyle and evolutionary history of bacterial species. Specifically, strong discordance between  
748 core genome and pan-genome trees is suggestive of extensive genomic flux among lineages [102], which



749 obscures the clonal relationship between strains in the gene content tree. For example, genome analyses  
750 of core genome and gene content in the marine bacteria *Vibrio* have shown strong discordance,  
751 suggesting extensive horizontal transfer between lineages [103]. However, other species like the marine  
752 bacterium *Prochlorococcus* have concordant core genome and gene content phylogenies [104],  
753 suggesting that horizontal transfer has played a lesser role in their evolutionary history.

754

755 In *P. syringae*, the core genome and gene content trees are largely concordant at the level of  
756 phylogroups. The one major exception to this concordance is the relationship between phylogroups 2  
757 and 10, which cluster more closely in the gene content tree than they do in the core genome tree.  
758 Previous studies have shown that phylogroups 2 and 10 have similar virulence repertoires [57], and that  
759 almost all strains from these phylogroups have high ice nucleation activity [9, 73, 105]. This elevated  
760 gene content and phenotypic similarity likely reflects similarity in the lifestyles and ecology of strains from  
761 these phylogroups, which may be the result of increased horizontal transfer, convergent evolution, or  
762 both. Indeed, we find that the 2,832 gene families that are in the soft-core genome (>95% of strains) of  
763 both phylogroups 2 and 10 are significantly more likely to be evolutionarily significant (Chi-squared  
764 proportions test;  $\chi^2 = 832.31$ ,  $df = 1$ ,  $p < 0.0001$ ) and ecologically significant (Chi-squared proportions  
765 test;  $\chi^2 = 9.72$ ,  $df = 1$ ,  $p = 0.0018$ ) than the remaining 14,975 non-core families. However, gene families  
766 in the soft-core genome of phylogroups 2 and 10 are significantly less likely to be involved in inter-  
767 phylogroup recombination events than other genes (Chi-squared proportions test;  $\chi^2 = 15.22$ ,  $df = 1$ ,  $p <$   
768  $0.0001$ ). This suggests that phylogroups 2 and 10 strains do not exchange more genes than the rest of  
769 the *P. syringae* species complex through recombination. Consequently, convergent evolution likely plays  
770 a key role in the increase of shared genes between these two phylogroups. It is nevertheless important  
771 to emphasize that the *P. syringae* core genome and gene content trees are largely concordant at the  
772 level of phylogroups, which suggests that although we do find some evidence of genomic flux, the rate  
773 of inter-phylogroup horizontal transfer is not sufficient to obscure the phylogenetic signature of vertical  
774 gene inheritance.

775

776 The *P. syringae* species complex is unquestionably highly diverse, and claims have been made that the  
777 diversity between phylogroups is actually greater than the observed diversity between well-established  
778 species [58]. We used the entire soft core genome alignment to estimate the level of genetic divergence  
779 between all phylogroups to explore whether distinct phylogroups do in fact have consistently higher  
780 genetic divergence than distinct species pairs (Figure S4). We determined that average *Ka* and *Ks* values  
781 among strains in the primary phylogroups were less than the average values between *P. aeruginosa* and  
782 *P. putida* strains, and *E. coli* and *S. enterica* strains. The average among primary phylogroup *Ka* value  
783 was also lower than the average values between strains of *A. hydrophila* and *A. salmonicida*, although  
784 the *Ks* value was roughly similar. Estimates of *Ka* and *Ks* between *N. gonorrhoeae* and *N. polysaccharea*  
785 are considerably lower than those of both *P. syringae* phylogroups and other distinct species pairs, but  
786 the *Neisseria* genus is known to be highly recombinogenic, which can distort evolutionary rates, making  
787 this species pair a likely outlier [62]. In contrast, both the average *Ka* and *Ks* values obtained when  
788 comparing strains between primary and secondary phylogroups, and those between secondary  
789 phylogroups are more consistent with the distinct species pairs, with a few exceptions. Overall, these  
790 analyses suggest that the primary phylogroups are not excessively divergent relatively to other bacterial  
791 species, in contrast to the secondary phylogroups, which may be sufficiently divergent to be considered  
792 distinct species.

793

#### 794 **Phylogenetic Distribution Ecologically Significant Genes**

795 A unifying feature among all strains in the *P. syringae* species complex is the presence of at least one  
796 T3SS. The most common T3SS in the *P. syringae* species complex is the canonical T-PAI T3SS, and  
797 consistent with prior studies, we found that nearly all agriculturally associated strains carry one. In  
798 addition, we also found that a number of non-agricultural strains from phylogroups 9 and 10 possess a  
799 canonical T-PAI T3SS. These data are consistent with an earlier report of the presence of a canonical T-  
800 PAI T3SS in non-agricultural strains from phylogroup 1A [21, 22], some of which were shown to cause  
801 disease on tomato. Although the host-range of these non-agricultural strains from phylogroups 9 and 10

802 has yet to be studied experimentally, it raises the interesting possibility that they may be pathogens of  
803 wild plant species and act as a reservoir for the recurrent emergence of crop pathogens.

804

805 In addition to the canonical T-PAI T3SS, we also found that many *P. syringae* strains possess an R-PAI  
806 T3SS, while the A-PAI and S-PAI T3SSs are found in a small number of strains isolated in discrete  
807 phylogroups. The A-PAI and S-PAI T3SSs are always present in the absence of the canonical T-PAI,  
808 suggesting that they may serve as a replacement T3SS in a different niche. In contrast, the R-PAI T3SS  
809 is always present in concert with at least one other T3SS. Bacteria with multiple T3SSs that have  
810 complementary functions have been reported previously [106, 107]. For example, *Salmonella* species  
811 contains two different T3SSs known as SPI-1 and SPI-2 [106]. SPI-1 promotes bacterial pathogenicity  
812 by facilitating host invasion, while SPI-2 is critical for survival, replication and dissemination of the bacteria  
813 after it enters the host cell [108]. This is also not the first study report of the presence of the R-PAI T3SS  
814 outside of *Rhizobium* species. A wide array of symbiotic and non-pathogenic bacteria, including  
815 *Photobacterium luminescens*, *Sodalis glossinidius*, *Pseudomonas fluorescens*, and *Desulfovibrio vulgaris*,  
816 have also been reported to harbor the R-PAI T3SS [108]. Although its expression in *P. syringae* is low  
817 and its function outside of *Rhizobia* remains unclear [72], the broad distribution of this the R-PAI T3SS  
818 across *P. syringae* strains implies that it is likely of functional importance for a number of strains in the  
819 complex.

820

821 The phylogenetic distribution of the different T3SSs and our phylogenetic analysis of the conserved HrcV  
822 protein from all T3SSs also sheds critical light on the evolutionary history of each T3SS in the *P. syringae*  
823 species complex. The broad phylogenetic distribution of the T-PAI T3SS has led some previous studies  
824 to conclude that it was present in the most recent common ancestor of the *P. syringae* species complex  
825 [109, 110], while others have suggested that the canonical T-PAI may have been acquired after the  
826 divergence of the primary and secondary phylogroups [69, 73]. Indeed, the patchy distribution among  
827 strains in the secondary phylogroups (i.e. found in only 37.50% of secondary phylogroup strains vs.  
828 97.91% for primary phylogroup strains) observed here provides evidence that the canonical T-PAI was

829 acquired after the divergence of the primary and secondary phylogroups. However, acquisition by the  
830 common ancestor of all *P. syringae* and subsequent loss by secondary phylogroup lineages is also a  
831 possibility.

832

833 Two additional lines of evidence support the early acquisition of both the T-PAI and the R-PAI T3SSs.  
834 First, the genomic region encoding these T3SSs shares the same %GC as the rest of the genome [6,  
835 72]. Second, the HrcV genealogies from both the T-PAI and the R-PAI T3SSs are generally congruent  
836 with the core genome tree (Figure 2A; Figure S6), indicating a common evolutionary history. In contrast,  
837 the rarity of the A-PAI and S-PAI T3SSs in the *P. syringae* complex suggest later horizontal transfer into  
838 only a few *P. syringae* lineages. Specifically, the A-PAI T3SS appears to have been acquired  
839 independently in phylogroup 13 and a small group of phylogroup 2 strains (phylogroup 2c), as evidenced  
840 by the unique location of the A-PAI T3SS in these two genomes. The S-PAI T3SS, which is most closely  
841 related to the T3SS found in *Erwinia* and *Pantoea* species, is also present in two distantly related  
842 phylogroups (7 and 11) which are reported to be pathogenic on some plants [9].

843

844 As shown in previous studies [6, 18, 111], T3SEs that are delivered by the T3SS are patchily distributed  
845 across the *P. syringae* species complex with a few exceptions. The presence of these T3SEs in only a  
846 small but diverse suite of strains suggests that horizontal gene transfer is common in these families and  
847 that they are subject to strong diversifying selection. Specifically, T3SEs are known to experience  
848 frequent gain/loss events and rapid sequence diversification to obtain new functional capabilities or avoid  
849 host immune recognition [18, 112-114]. The phylogenetic distribution and diversification of the effectors  
850 analyzed in this study suggests that both of these evolutionary forces are at play in a large number of the  
851 *P. syringae* T3SE families. Despite the patchy distribution of most T3SEs, prior studies have identified a  
852 set of four core T3SEs, which include *avrE1*, *hopAA1*, *hopM1*, and *hopI1* (Lindeberg *et al.*, 2012; O'Brien  
853 *et al.*, 2011a). We confirmed this characterization for the *avrE1* and *hopAA1* families, but the *hopM1* and  
854 *hopI1* effectors are not present in more than 95% of the strains analyzed in this study, even though they  
855 are present in the majority of strains from the primary phylogroups. In addition to *avrE1* and *hopAA1*, we

856 also identified a third core T3SE, *hopAJ1*, and two other T3SE families, *hopAN1* and *hopJ1*, that are  
857 present at some frequency in all eleven phylogroups. Finally, using an HMM-modelling approach that  
858 searches for the conserved N-terminal secretion signal and the *hrp*-box promoter of known T3SEs, we  
859 have also proposed a new set of novel T3SEs in the *P. syringae* species complex that are strong  
860 candidates for functional assays (Table S1).

861

## 862 **Recombination and Genetic Cohesion in the *P. syringae* species complex**

863 Recombination plays a significant role in the evolution of bacteria [95, 115], and while it can lead to either  
864 genetic diversification or homogenization depending on the population structure of the donor and  
865 recipient strains, the latter role is particularly important in maintaining genetic cohesion within a species  
866 [31, 34, 115, 116]. Previous studies in *P. syringae* have reported that recombination between phylogroups  
867 is relatively rare [8, 58, 117]. However, these studies were based on analyses of a small set housekeeping  
868 genes in a limited collections of strains, so lacked a sufficient genomic and sampling depth to draw firm  
869 conclusions about the extent of recombination across the pan-genome. This is particularly important  
870 because it has been suggested that horizontal transfer occurs at a relatively high rate in the accessory  
871 genome and has a disproportionate effect on strain adaptation in nature [5, 18, 58] . Our analysis found  
872 a signature of recombination in 11,533 (64.77%) of the 17,807 ortholog families that were present in at  
873 least five *P. syringae* strains. Among the 4,433 recombination events identified by GENECONV, 2,476  
874 (55.85%) of these events were intra-phylogroup recombination events, while the remaining 1,957  
875 (44.15%) were inter-phylogroup recombination events. These findings reaffirm that recombination within  
876 phylogroups is more common than recombination between phylogroups, likely as a result of the well-  
877 established linear relationship between sequence divergence and the logarithm of the recombination rate  
878 [94, 95]. However, while sequence similarity appears to be the key factor determining the rate of  
879 recombination between relatively closely related strains within the primary phylogroups, our data suggest  
880 that recombination between more distantly related strains appears to be governed by other forces (Figure  
881 5). A particularly intriguing finding is that phylogroup 10 strains cluster with secondary phylogroup strains  
882 with respect to their pairwise recombination frequency, despite the fact that phylogroup 10 is a primary

883 phylogroup in the core genome tree (Figure 2). The major distinction between phylogroup 10 strains and  
884 the bulk of the primary phylogroup strains is that they were isolated from non-agricultural sources, as  
885 were most of the secondary phylogroup strains. This may indicate that ecology plays a more important  
886 role in determining the extent of recombination than sequence similarity, at least for long-distance (e.g.  
887 between phylogroup) genetic exchange.

888

889 Although inter-phylogroup recombination is rarer than intra-phylogroup recombination overall, we also  
890 used our expanded dataset to explore whether specific evolutionarily and ecologically important gene  
891 families more frequently undergo inter-phylogroup recombination than other gene families. For  
892 ecologically important genes, we used all virulence associated orthologous gene families that were  
893 identified by the VFDB (885/17,807; 4.97%). For evolutionarily important genes, we used all orthologous  
894 gene families determined to be positively selected at least one site by FUBAR (3,888/17,807; 21.83%).  
895 The analysis showed that both ecologically and evolutionarily important gene families are more likely to  
896 be subjected to inter-phylogroup recombination than other gene families (Figure 6). This finding is  
897 consistent with the observation that ecologically adaptive genes are successfully transferred at high rates  
898 among diverse strains in a species complex [118], and suggests that inter-phylogroup recombination  
899 disproportionally spreads ecologically and evolutionarily important genes across phylogroups, which may  
900 help maintain genetic cohesion within the *P. syringae* species complex.

901

## 902 **Fundamental Evolutionary Principles for Delimiting *P. syringae* Species**

903 There is a long history to the debate over the appropriate way to delimitate species within the *P. syringae*  
904 complex [12], stemming from the use of largely arbitrary and ad hoc species delimitation cutoffs in DNA-  
905 DNA hybridization assays, MLST analyses, and pathotype designations [12, 17, 119, 120]. Importantly,  
906 these prior studies have largely been poorly-powered in terms of both the number of strains and the  
907 number of genes analyzed. Because the current study dramatically increases both the number and  
908 diversity of *P. syringae* strains sampled, we obtain a unique perspective into the ecological and

909 evolutionary forces operating in the *P. syringae* species complex, and suggest that future work to delimit  
910 the complex should be founded in fundamental evolutionary processes.

911

912 From an ecological perspective, species differentiation results from the adaptation of two or more  
913 subpopulations to different environments or niches [96, 121]. Here, diversifying selection among a few  
914 loci that are essential for differential adaptation to alternative environments can drive speciation in the  
915 absence of barriers to recombination. There is evidence that this has occurred in *P. syringae*, given the  
916 broad global distribution and diverse disease-causing capabilities of *P. syringae* strains [1]. Specifically,  
917 Moteil *et al.* show weak ecological differentiation between an agricultural pathogenic *P. syringae*  
918 population and a closely related environmental population of *P. syringae*, despite there being no barrier  
919 to recombination between these populations [22]. However, it is currently unclear what the differentially  
920 selected loci in these populations are and whether they have sufficiently diverged to be considered an  
921 early speciation event. Furthermore, the lack of correlation between the core genome phylogenetic profile  
922 of *P. syringae* strains and their pathovar designations suggests that there are many different pathways  
923 for adaptation to a single host, so ecological differentiation on its own is likely a poor way to speciate the  
924 *P. syringae* species complex [9, 18, 21, 22]. Future studies should focus on expanding the dataset of  
925 non-agricultural *P. syringae* strains so that we can more effectively distinguish and analyze loci that are  
926 differentially selected in ecologically divergent strains.

927

928 Both sequence clustering and recombination barriers have been used to delimit bacterial species based  
929 on evolutionary principles [122]. Yet, even with the growing abundance of genomic data, it is unlikely that  
930 any one criteria will adequately resolve species barriers in the *P. syringae* complex, largely due to the  
931 fluid nature of bacterial genomes. However, given what we now know about the phylogenetic  
932 relationships between strains, the distribution of ecologically and evolutionarily important genes, the  
933 disproportionately high rate of inter-phylogroup recombination among ecologically and evolutionarily  
934 significant loci, and finally, the common ecology of diverse *P. syringae* strains, we propose that there is  
935 no ecologically or evolutionarily justifiable basis to split the strains of the primary phylogroups of *P.*



936 *syringae* into separate species. In fact, *P. syringae* provides an outstanding example of how  
937 recombination, despite being relatively infrequent, maintains genetic cohesion in this very widespread,  
938 diverse, and globally significant lineage.

939

## 940 **METHODS**

941

### 942 **Genome Sequencing and Assembly**

943 A total of 391 *P. syringae* strains and 22 outgroup *Pseudomonas* strains were used in this study  
944 (Supplemental Dataset S1). The genome assemblies and annotations for 145 of these strains were  
945 obtained from public sequence databases, including NCBI/GenBank, JGI/IMG-ER, and PATRIC [123-  
946 125]. The remaining 268 strains were obtained from the International Collection of Microorganisms from  
947 Plants (ICMP) and other collaborators, and were sequenced, assembled, and annotated in the Center  
948 for the Analysis of Genome Evolution and Function (CAGEF) at the University of Toronto. For these  
949 strains, DNA was isolated using the Genra Puregene Yeast and Bacteria Kit (Qiagen, MD, USA). Purified  
950 DNA was then suspended in TE buffer and quantified with the Qubit dsDNA BR Assay kit (ThermoFisher  
951 Scientific, NY, USA). Paired-end libraries were generated using the Illumina Nextera XT DNA Library  
952 Prep Kit following the manufacturer's instructions (Illumina, CA, USA), with 96-way multiplexed indices  
953 and an average insert size of  $\approx$ 400 bps. All sequencing was performed on either the Illumina MiSeq or  
954 GAIIX platform using V2 chemistry (300 cycles). Following sequencing, read quality was assessed with  
955 FastQC [126] and low-quality bases and adapters were trimmed using Trimmomatic v0.30  
956 (ILLUMINACLIP: TruSeq3-PE.fa, Seed Mismatch = 2, Palindromic Clip Threshold = 30, Simple Clip  
957 Threshold = 10; SLIDINGWINDOW: Window Size = 4, Required Quality = 15; LEADINGBASEQUALITY  
958 = 3; TRAILINGBASEQUALITY = 3; MINLEN = 25) [45].

959

960 The trimmed paired-end reads for each of the 268 *Pseudomonas* genomes sequenced at CAGEF were  
961 *de novo* assembled into contigs using the CLC assembly cell v4.2 program from CLCBio (Mode = fb,  
962 Distance Mode = ss, Minimum Read Distance = 180, Maximum Read Distance = 250, Minimum Contig



963 Length = 200). All contigs that were less than 200 bps long were then removed from each assembly and  
964 the raw reads from each strain were re-mapped to the remaining contigs using `clc_mapper`. Next, using  
965 `clc_mapping_info` and `clc_info`, we calculated the read coverage for each contig in each assembly and  
966 compared that with the average contig coverage of the genome assembly to identify contigs with atypical  
967 coverage ( $> 2$  standard deviations from the average contig coverage). These atypically covered contigs  
968 were then compared to the EMBL plasmid sequence database and the GenBank nucleotide database  
969 using BLAST and were removed from the assembly if they were not identified as part of a plasmid  
970 sequence.

971

972 Gene prediction for these 268 draft *Pseudomonas* assemblies was performed using DeNoGAP [46],  
973 which predicts genes based on the combined output of Glimmer, GeneMark, Prodigal, and  
974 FragGeneScan [47-50, 127]. For most genes, these algorithms accurately predicted both the start and  
975 the stop positions, but in some instances, genes were incomplete (missing appropriate start and/or start  
976 coding). In these cases, we extended the gene as a triplet codon until a stop codon was found at both  
977 the 5' and 3' end. The first Methionine codon downstream from the 5' stop codon was considered the  
978 start codon, while the first 3' stop codon was considered the stop codon. This approach allowed us to  
979 obtain complete coding sequences for a number of incomplete genes, but for others we were unable to  
980 predict a start and stop codons due to a contig break or an assembly gap. These and any other genes  
981 that contained runs of N's were considered partial genes and were excluded from the final dataset to  
982 avoid complications in downstream comparative and evolutionary analyses. Furthermore, complete  
983 coding regions that were only predicted by one program and could not be verified by blasting against the  
984 UniProtKB/SwissProt database or pass a minimum length cutoff of 100bps were discarded. The final  
985 collection of coding sequences was then sorted by genome location, and any coding regions that  
986 overlapped by more than 15 bases were merged into a single coding sequence.

987

988 All complete genes were then annotated using a `blastp` search of the corresponding protein sequences  
989 for each gene against the UniProtKB/SwissProt database with an e-value threshold of  $1^{-5}$  [51]. The name

990 and/or description of the best hit was assigned to the corresponding protein and proteins that did not  
991 have any significant hits were assigned as hypothetical proteins. Gene ontology terms, protein domains,  
992 and metabolic pathways were also annotated in each complete gene using InterProScan v.5 (E-Value <  
993  $1^{-5}$ ) [52]. All complete genes were also assigned Cluster of Orthologous Group (COG) categories using  
994 a blastp search against the COG database (E-Value <  $1^{-5}$ ) [53, 128]. However, COG families were only  
995 assigned if the protein query had high sequence identity and coverage (> 70%) with at least three member  
996 sequences in the family.

997

### 998 **Ortholog Prediction and Phylogenetic Analysis**

999 We clustered all complete protein sequences from the 413 *Pseudomonas* genomes described above,  
1000 which included 391 *P. syringae* strains representing 11 of the 13 phylogroups, into putative homolog and  
1001 ortholog families using DeNoGAP [46]. First, all protein sequences from the closed genome of *P. syringae*  
1002 DC3000 were used to construct seed HMM families for DeNoGAP [65], using an all-vs-all pairwise protein  
1003 sequence comparison with phmmer (E-Value <  $1^{-10}$ ) [129]. Proteins that had greater than 70% identity  
1004 and 70% coverage for both sequences were clustered together using Markov Chain Clustering (MCL)  
1005 (Inflation Value = 1.5) [130]. Proteins that did not pass these criteria with any other protein sequence in  
1006 the HMM database were clustered separately into a new protein family. The protein sequences from the  
1007 remaining 412 genomes were then iteratively scanned against the reference HMM database as described  
1008 above, updating the HMM model and database after each iteration. Following the initial clustering of all  
1009 proteins from the 413 *Pseudomonas* genomes into putative homolog families, HMM families were  
1010 grouped into larger families if at least one member of a family shared more than 70% identity with at least  
1011 one member of another family. Orthologous protein pairs were then extracted from these homolog  
1012 families using the reciprocal pairwise distance approach and were clustered into ortholog families using  
1013 MCL (Inflation Value = 1.5) [130].

1014

1015 Once all gene families had been clustered, we analyzed the pan-genome of *P. syringae* using a binary  
1016 presence-absence matrix for each ortholog family in the 391 *P. syringae* genomes, where 1's were used

1017 to encode presence and 0's were used to encode absence [131]. We assigned all gene families that were  
1018 present in at least 95% of the *P. syringae* strains in our dataset to the soft core genome and all other  
1019 gene families to the accessory genome. The more lenient cutoff of 95% is justified because it allows us  
1020 to limit the artificial reduction in the core genome size that occurs because of disrupted or unannotated  
1021 core genes in some draft genomes (Figure S2). We then determined whether the pan-genome of *P.*  
1022 *syringae* was opened or closed using the “micropan” R package [55]. Here, a rarefaction curve of the  
1023 entire pan-genome was computed using 100 permutations, each of which was computed using a random  
1024 genome input order. The curve was then fitted to Heap's Law model to calculate the average number of  
1025 unique ortholog clusters observed per genome and determine whether the pan-genome is opened or  
1026 closed.

1027

1028 The phylogenetic relationships between the 391 *P. syringae* strains analyzed in this study were explored  
1029 using both a soft core genome tree and a pan genome content tree. For the core genome tree, we multiple  
1030 aligned the protein sequences from each soft core ortholog family using Kalign Version 2, which uses the  
1031 Wu-Manber pattern matching algorithm [132]. We then concatenated these alignments and removed all  
1032 monomorphic sites from this alignment using an in-house perl script. The core genome maximum  
1033 likelihood phylogenetic tree was then constructed using FastTree with default parameters [133]. FastTree  
1034 uses a combination of maximum likelihood nearest-neighbor interchange (NNIs) and minimum evolution  
1035 subtree-pruning-regrafting (SPRs) methods for constructing phylogenies [133-135]. Local branch support  
1036 values for the topology of the phylogenetic tree were also calculated in FastTree using Shimodaira-  
1037 Hasegawa (SH) test [136]. For the genetic content tree, we used the shared gene-content information  
1038 from the “micropan” R package to calculate the genetic distance between each strain and generate a  
1039 pan-genome distance matrix with Jaccard's method. The topological robustness of the gene content tree  
1040 was tested by performing average linkage hierarchical clustering with 100 bootstraps. This same method  
1041 was also employed for the effector content and EEL content trees.

1042

1043 **Identification and Analysis of Ecologically Relevant Genes**

1044 The first set of ecologically relevant genes that we investigated were the genes that constitute the T3SS,  
1045 a key virulence determinant in pathogenic *P. syringae* strains. Specifically, we used the core structural  
1046 genes of different forms of T3SSs, including the canonical tripartite pathogenicity island (T-PAI) T3SS,  
1047 the atypical pathogenicity island (A-PAI) T3SS, the single pathogenicity island (S-PAI) T3SS, and the  
1048 Rhizobium-like pathogenicity island (R-PAI) T3SS to explore the distribution of different T3SSs across  
1049 the *P. syringae* species complex. To determine if a particular form of T3SS was present in a given strain,  
1050 we performed a tblastn search for the core structural genes of each T3SS against each *P. syringae*  
1051 genome assembly with an e-value cutoff of  $1^{-5}$ . All core structural genes for each T3SS were downloaded  
1052 from NCBI GenBank, using *P. syringae* DC3000 and *P. viridiflava* PNA3.3a as references for the T-PAI  
1053 T3SS, *P. syringae* Psy642 and *P. syringae* PsyUB246 as references for the A-PAI T3SS, *P. viridiflava*  
1054 RMX3.1b as a reference for the S-PAI T3SS, and *P. syringae* 1448A as a reference for the R-PAI T3SS.  
1055 We then chose the top hits for each T3SS structural gene in each genome, translated the region into a  
1056 protein sequence, and confirmed that there were no premature truncations in the sequence. A given  
1057 T3SS was considered present if all core structural genes for that T3SS were present and not truncated.  
1058 These presence/absence data were then used to analyze the distribution of different T3SSs across the  
1059 *P. syringae* species complex.

1060

1061 The second ecologically relevant genes that we explored were the T3SEs that are delivered into plant  
1062 hosts by the T3SS. To analyze the distribution of T3SEs across the *P. syringae* species complex, we  
1063 predicted known and novel T3SEs using discrete pipelines. For known T3SEs, we performed a tblastn  
1064 against each *P. syringae* assembly using a collection of 1,215 experimentally verified or computationally  
1065 predicted effector sequences downloaded from the BEAN 2.0 database (E-Value  $< 1^{-5}$ ) [75]. If a  
1066 significant hit was identified for a T3SE, the region of the best or only hit was extracted from the genome  
1067 as a putative T3SE. To identify novel T3SEs, we first constructed an HMM-model using known *hrp*-box  
1068 motifs from three completely sequenced *P. syringae* genomes (*Pto* DC3000, *Pph* 1448A, and *Psy* B728A)  
1069 [65, 70, 79, 137]. These motif sequences were multiple aligned using Kalign2 [132] and the HMM-model  
1070 was constructed using hmmbuild [129]. The *hrp*-box HMM model was then scanned against each *P.*

1071 *syringae* genome assembly using nhmmer with a high e-value (10,000) and low bit score (4) threshold,  
1072 given the likelihood that this model would yield false positives as a result of the short sequence length.  
1073 Because a number of T3SEs are known to reside in operons, we then inspected the ten genes  
1074 downstream of each predicted *hrp*-box motif for a N-terminal secretion signal using EffectiveT3 [138]. If  
1075 a gene was both a less than 10 genes downstream of a *hrp*-box and classified as a T3SE based on their  
1076 N-terminal secretion signal, we considered them putative novel T3SEs. The effector repertoire of each  
1077 *P. syringae* strain was ultimately used to characterize the core and accessory effector profile of the *P.*  
1078 *syringae* species complex.

1079

1080 A third set of ecologically relevant genes that we studied consisted of seven well-characterized  
1081 phytotoxins of the *P. syringae* species complex, including coronatine, phaseolotoxin, tabtoxin,  
1082 mangotoxin, syringolin, syringopectin, and auxin [76]. To determine if these pathways were present in  
1083 each genome, we performed a tblastn search (E-Value < 1<sup>-5</sup>) using known proteins that are involved in  
1084 the synthesis of each phytotoxin against each *P. syringae* genome assembly. Representative query  
1085 sequences that are involved in the biosynthesis of each phytotoxin were obtained from GenBank, using  
1086 strain PtoDC3000 for coronatine (17 biosynthesis genes), PsyBR2R for tabtoxin (20 biosynthesis genes),  
1087 and PsyUMAF0158 for phaseolotoxin (17 biosynthesis genes), mangotoxin (10 biosynthesis genes),  
1088 syringolin (6 biosynthesis genes), syringopectin (11 biosynthesis genes), and auxin (2 biosynthesis  
1089 genes). If significant hits were found in a given genome for more than half the of the biosynthesis genes  
1090 of a phytotoxin, it was considered present, and if not, the phytotoxin was considered absent. These  
1091 presence/absence data were ultimately used to study the distribution of phytotoxins across the *P.*  
1092 *syringae* species complex.

1093

1094 Finally, we also identified the complete collection of known virulence factors in each genome using the  
1095 virulence factor database (VFDB, version R3), a reference database of bacterial protein sequences that  
1096 contains more than 1,798 virulence factors from a total of 932 bacterial strains that represent 75 bacterial  
1097 genera [63, 139, 140]. Specifically, we predicted virulence factors in each *P. syringae* genome by blasting

1098 the proteome of the genome against the entire VFDB (E-Value < 1<sup>-5</sup>). A protein sequence was considered  
1099 a virulence factor if a hit was found that had more than 70% identity with a sequence in the VFDB  
1100 database.

1101

### 1102 **Identification and Analysis of Evolutionarily Significant Genes**

1103 We classified any orthologous gene families that had one or more sites under positive selection as  
1104 evolutionarily significant. To identify these ortholog families, we used the Fast Unconstrained Bayesian  
1105 Approximation (FUBAR) pipeline to measure the ratio of non-synonymous substitution rates to  
1106 synonymous substitution rates ( $Ka/Ks$ ) at each site in each ortholog family [86]. The FUBAR pipeline was  
1107 chosen because it implements a Markov Chain Monte Carlo (MCMC) sampler for inferring sites under  
1108 positive selection, which makes it more efficient for inferring sites under positive selection in large  
1109 alignments than other methods and allows us to account for the effects of recombination on signatures  
1110 of selection [141]. For this analysis, we used the output of the GARD recombination analysis to partition  
1111 ortholog families into non-recombinant fragments. We then analyzed both the partitioned and un-  
1112 partitioned datasets using FUBAR with 10 MCMC chains, where the length of each chain was equal to  
1113 5,000,000, the burn-in was equal to 2,500,000, the Dirichlet Prior parameter was set to 0.1, and 1,000  
1114 samples were drawn from each chain. Evolutionarily significant genes were extracted from each genome  
1115 if they were part of an orthologous family that had one or more sites under positive selection in the  
1116 partitioned analysis.

1117

### 1118 **Detection of Genetic Recombination**

1119 We searched for signatures of homologous recombination within the *P. syringae* species complex using  
1120 GARD [87], CONSEL [88], GENECONV [89], and PHIPACK [90] in all 17,807 ortholog families that were  
1121 present in at least five strains. First, to generate input alignments for the recombination software, we  
1122 independently aligned the nucleotide sequences for all ortholog families using translatorX [142], then  
1123 heuristically removed sequences with a high frequency of gaps using the heuristic algorithm option (t=50)  
1124 in MaxAlign [143]. For GARD, we analyzed the codon alignment of each family using default parameters,

1125 then parsed significant recombination breakpoints in the GARD results file. For CONSEL, we first  
1126 constructed a protein tree and corresponding core genome tree for all strains in each ortholog family  
1127 using FastTree [133]. CONSEL was then used with default settings to calculate and compare the per-  
1128 site likelihood values for these two trees with the gamma option, and ortholog families that were  
1129 significantly incongruent were identified as recombinant families. For GENECONV, we used a gscale  
1130 parameter of 1 and otherwise default settings to detect significant signatures of recombination in each  
1131 family based on the polymorphic sites in the multiple alignment. Lastly, for PHIPACK, we employed  
1132 default settings to test for signatures of recombination based on the maximum chi-square (MaxChi2), the  
1133 neighbor similarity score (NSS), and the pairwise homoplasy index (PHI) statistical frameworks [90]. The  
1134 MaxChi2 method classifies ortholog families as recombining if a non-uniform distribution of sequence  
1135 differences exists along the alignments. The NSS method classifies recombination when adjacent sites  
1136 show significant incongruence compared to other sites. The PHI method computes an incompatibility  
1137 score over a sliding window in the alignment using only parsimoniously informative sites, then calculates  
1138 a p-value for recombination in the alignment by column permutation [90]. In all tests, recombination was  
1139 considered significant if the p-value was less than 0.05 after correcting for multiple comparisons. Ortholog  
1140 families with significant signatures of recombination in the GARD, CONSEL, GENECONV, and PHIPACK  
1141 analyses were then combined to estimate recombination rates within the *P. syringae* species complex,  
1142 after normalizing for the number of orthologs, the number of strains, and the branch lengths in each  
1143 phylogroup. We also differentiated between intra- and inter-phylogroup recombination events for  
1144 recombination events identified by GENECONV using their pairwise recombination rates.

1145

1146 In addition to assessing which gene families appear to be undergoing recombination within and between  
1147 *P. syringae* phylogroups, we explored HGT between *P. syringae* and more distantly related species using  
1148 a blastp search of all protein sequences in each *P. syringae* strain against the non-redundant NCBI  
1149 GenBank database using an e-value cutoff of  $1^{-5}$ , a percent identity cutoff of 70%, and a percent query  
1150 coverage cutoff of 70%. The top three blast hits were then extracted for each protein and the results were  
1151 parsed to retain only matches from non-*P. syringae* species. Any of these remaining hits were viewed as



1152 potential HGT events. Although this approach is unlikely to provide accurate measures of the extent of  
1153 HGT in the *P. syringae* species complex, it provides critical information on common donor and/or recipient  
1154 species that may be sharing a niche and DNA with *P. syringae* strains.

1155

### 1156 **Estimating Relative Sequence Divergence (*Ka/Ks*)**

1157 For each *P. syringae* strain pair, we used the concatenated soft core genome alignments to calculate the  
1158 pairwise rates of non-synonymous (*Ka*) and synonymous (*Ks*) substitution using the SeqinR package in  
1159 R [59]. Average *Ka* and *Ks* values were then calculated for all phylogroups and between strains of  
1160 different phylogroups. For comparison, we also calculated the evolutionary rates of a number of different  
1161 distinct species pairs, including *A. hydrophila* (NC\_0008570.1) – *A. salmonicida* (NC\_009348.1,  
1162 NC\_004923.1, NC\_004925.1, NC\_004924.1, NC\_009349.1, NC\_009350.1), *N. gonorrhoeae*  
1163 (NC\_002946.2) – *N. meningitides* (NC\_003112.2), *P. aeruginosa* (NC\_002516.2) – *P. putida*  
1164 (NC\_009512.1), and *E. coli* (NC\_002695.1, NC\_002127.1, NC\_002128.1) – *S. enterica* (NC\_003198.1,  
1165 NC\_003384.1, NC\_003385.1). Here, we identified core genes that were shared by each strain pair using  
1166 a pairwise protein blast with an e-value threshold of  $1^{-5}$ , and sequence identity and query coverage cutoffs  
1167 of 80%. We then aligned these core nucleotide sequences using TranslatorX and MUSCLE, and  
1168 concatenated the alignments using a custom perl script. The *Ka* and *Ks* values for each of these species  
1169 pairs were calculated using the SeqinR package in R, as we did with the *P. syringae* strains.

1170 **FIGURE LEGENDS**

1171

1172 **Figure 1:** Rarefaction curves for the core (A) and accessory (B) genome of *P. syringae*, as estimated  
1173 using PanGP. A) Families present in 95% (soft core genome) and 100% (hard core genome) of *P.*  
1174 *syringae* strains exponentially decays as each new genome is added to the analysis. B) The total number  
1175 of gene families identified continues to increase indefinitely as each new genome is added to the analysis  
1176 when singleton gene families (families that are only present in one strain) are included, suggesting that  
1177 *P. syringae* has an open pan-genome.

1178 **Figure 2:** Core (A) and pan (B) genome phylogenies of *Pseudomonas syringae* strains. The core  
1179 genome, maximum-likelihood tree was generated from a core genome alignment of the 2,457 core genes  
1180 present in at least 95% of the *P. syringae* strains analyzed in this study. The pan-genome tree was  
1181 generated by hierarchical clustering of the gene content in each strain using the Jaccard coefficient  
1182 method for calculating the distance between strains and the Ward hierarchical clustering method for  
1183 clustering. Strain phylogroups, hosts of isolation, and whether the strain is a type or pathotype strain are  
1184 shown outside the tree.

1185 **Figure 3:** Prevalence of different forms of type III secretion systems (T3SSs) and phytotoxin biosynthesis  
1186 genes in each of the *P. syringae* phylogroups. A given T3SS was considered present if all full-length,  
1187 core, structural genes of the T3SS were present in the genome, while phytotoxins were considered  
1188 present if more than half of the biosynthesis genes for a given phytotoxin were present in the genome.

1189 **Figure 4:** Prevalence of all known type III secreted effectors (T3SEs) in each of the *P. syringae*  
1190 phylogroups analyzed in this study. T3SEs were identified using a tblastn of 1,215 experimentally verified  
1191 or computationally predicted effector sequences from the BEAN 2.0 database, and were considered  
1192 present if a significant hit was found in the genome (E-Value < 1<sup>-5</sup>). Grey scaling indicates the prevalence  
1193 of each T3SE family within the respective phylogroups.

1194 **Figure 5:** Recombination analysis between *P. syringae* strains from different phylogroups (PGs).  
1195 Pairwise phylogroup recombination events were normalized based on the pan-genome size, the number  
1196 of strains, and the total branch length for each phylogroups pair. A) Regression analysis of recombination  
1197 rates and corresponding non-synonymous substitution rates ( $Ka$ ). There is a significant negative log  
1198 linear relationship between recombination rates and  $Ka$  for strains within the same phylogroup and  
1199 between different primary phylogroups ( $F = 49.51$ ,  $df = 30$ ,  $p < 0.0001$ ,  $r^2 = 0.6227$ ); however, the inverse  
1200 relationship exists when comparing more distantly related strains from different secondary phylogroups  
1201 and strains from primary and secondary phylogroups ( $F = 10.58$ ,  $df = 32$ ,  $p = 0.0027$ ,  $r^2 = 0.2485$ ) B)  
1202 Regression analysis of recombination rates and corresponding synonymous substitution rates ( $Ks$ ). The  
1203 same significant negative ( $F = 54.53$ ,  $df = 30$ ,  $p < 0.0001$ ,  $r^2 = 0.6451$ ) and positive ( $F = 11.40$ ,  $df = 32$ ,  $p$   
1204  $= 0.0019$ ,  $r^2 = 0.2627$ ) log linear relationships were observed for strains within the same phylogroup and  
1205 between different primary phylogroups, and more distantly related strains from different secondary  
1206 phylogroups and strains from primary and secondary phylogroups, respectively C) Hierarchical clustering  
1207 of homologous recombination frequency between phylogroups of the *P. syringae* species complex.  
1208 Pairwise distances between phylogroups were calculated using the Jaccard coefficient method, based  
1209 on the normalized pairwise recombination rates. Note that phylogroup 10 (PG10) is a primary phylogroup  
1210 that is more closely related to phylogroups 1, 2, 3, 4, 5, and 6. Agricultural vs. Environmental labeling  
1211 indicates that the bulk of the strains in these phylogroups come from these sources.

1212 **Figure 6:** Relationships between inter-phylogroup recombination, virulence-association (“ecologically  
1213 significant” loci), and positive selection (“evolutionarily significant” loci) for genes in *P. syringae* based on  
1214 chi-squared proportions tests. There is no significant association between positively selected and  
1215 virulence-associated genes (A). However, there is a significant positive association between gene  
1216 families that have undergone inter-phylogroup recombination with virulence-associated gene families (B),  
1217 positively selected gene families (C), and the small collection of gene families that are both virulence-  
1218 associated and positively selected (D). The Venn diagram (E) depicts the number gene families  
1219 undergoing inter-phylogroup recombination, the number of gene families that are virulence associated,

1220 and the number of gene families that are positively selected, as well as the significance of the overlap  
1221 between these families.

1222

## 1223 **TABLES**

1224 Not applicable.

1225

## 1226 **DATA ACCESS**

1227 All genomic data produced by this study have been submitted to NCBI. BioProject Accession numbers  
1228 for all genomes sequenced in this study and all publically available genomes are available in  
1229 Supplemental Dataset S1.

1230

## 1231 **ACKNOWLEDGMENTS**

1232 This work was supported by a Natural Sciences and Engineering Research Council of Canada Award to  
1233 DSG and a Canada Research Chair in Comparative Genomics to DSG. We thank all members of the  
1234 Guttman and Desveaux labs for helpful discussion and members of the CAGEF staff for technical support.

1235

## 1236 **DISCLOSURE DECLARATION**

1237 Not applicable.

1238

## 1239 **AUTHOR CONTRIBUTIONS**

1240 S.T., D.G. designed the research; M.D., S.T., R.A., and D.G. analyzed the data; and M.D., S.T., and D.G.  
1241 wrote the paper.

1242 **REFERENCES**

1243

- 1244 1. Mansfield J, Genin S, Magori S, Citovsky V, Sriariyanum M, Ronald P, et al. Top 10 plant  
1245 pathogenic bacteria in molecular plant pathology. *Mol Plant Pathol.* 2012;13(6):614-29. Epub  
1246 2012/06/08. doi: 10.1111/j.1364-3703.2012.00804.x. PubMed PMID: 22672649.
- 1247 2. Morris CE, Sands DC, Vinatzer BA, Glaux C, Guilbaud C, Buffiere A, et al. The life history of the  
1248 plant pathogen *Pseudomonas syringae* is linked to the water cycle. *ISME J.* 2008;2(3):321-34.  
1249 Epub 2008/01/11. doi: 10.1038/ismej.2007.113. PubMed PMID: 18185595.
- 1250 3. Jones JD, Dangl JL. The plant immune system. *Nature.* 2006;444(7117):323-9. doi:  
1251 10.1038/nature05286. PubMed PMID: 17108957.
- 1252 4. Vinatzer BA, Monteil CL, Clarke CR. Harnessing population genomics to understand how  
1253 bacterial pathogens emerge, adapt to crop hosts, and disseminate. *Annu Rev Phytopathol.*  
1254 2014;52:19-43. Epub 2014/05/14. doi: 10.1146/annurev-phyto-102313-045907. PubMed PMID:  
1255 24820995.
- 1256 5. Baltrus DA, McCann HC, Guttman DS. Evolution, genomics and epidemiology of *Pseudomonas*  
1257 *syringae*: Challenges in Bacterial Molecular Plant Pathology. *Mol Plant Pathol.* 2017;18(1):152-68.  
1258 doi: 10.1111/mpp.12506. PubMed PMID: 27798954.
- 1259 6. O'Brien HE, Thakur S, Guttman DS. Evolution of plant pathogenesis in *Pseudomonas syringae*: a  
1260 genomics perspective. *Annu Rev Phytopathol.* 2011;49:269-89. Epub 2011/05/17. doi:  
1261 10.1146/annurev-phyto-072910-095242. PubMed PMID: 21568703.
- 1262 7. Hwang MS, Morgan RL, Sarkar SF, Wang PW, Guttman DS. Phylogenetic characterization of  
1263 virulence and resistance phenotypes of *Pseudomonas syringae*. *Appl Environ Microbiol.*  
1264 2005;71(9):5182-91. doi: 10.1128/AEM.71.9.5182-5191.2005. PubMed PMID: 16151103;  
1265 PubMed Central PMCID: PMC1214625.
- 1266 8. Sarkar SF, Guttman DS. Evolution of the core genome of *Pseudomonas syringae*, a highly clonal,  
1267 endemic plant pathogen. *Appl Environ Microbiol.* 2004;70(4):1999-2012. Epub 2004/04/07.  
1268 PubMed PMID: 15066790; PubMed Central PMCID: PMC383139.
- 1269 9. Berge O, Monteil CL, Bartoli C, Chandeysson C, Guilbaud C, Sands DC, et al. A user's guide to a  
1270 data base of the diversity of *Pseudomonas syringae* and its application to classifying strains in this  
1271 phylogenetic complex. *PLoS One.* 2014;9(9):e105547. Epub 2014/09/04. doi:

- 1272 10.1371/journal.pone.0105547. PubMed PMID: 25184292; PubMed Central PMCID:  
1273 PMCPMC4153583.
- 1274 10. Anzai Y, Kim H, Park JY, Wakabayashi H, Oyaizu H. Phylogenetic affiliation of the  
1275 pseudomonads based on 16S rRNA sequence. *Int J Syst Evol Microbiol.* 2000;50(4):1563-89.
- 1276 11. Baltrus DA. Divorcing Strain Classification from Species Names. *Trends Microbiol.*  
1277 2016;24(6):431-9. Epub 2016/03/08. doi: 10.1016/j.tim.2016.02.004. PubMed PMID: 26947794.
- 1278 12. Bull CT, Manceau C, Lydon J, Kong H, Vinatzer BA, Fischer-Le Saux M. *Pseudomonas*  
1279 *cannabina* pv. *cannabina* pv. nov., and *Pseudomonas cannabina* pv. *alisalensis* (Cintas Koike and  
1280 Bull, 2000) comb. nov., are members of the emended species *Pseudomonas cannabina* (ex Sutic  
1281 & Dowson 1959) Gardan, Shafik, Belouin, Brosch, Grimont & Grimont 1999. *Syst Appl Microbiol.*  
1282 2010;33(3):105-15. Epub 2010/03/17. doi: 10.1016/j.syapm.2010.02.001. PubMed PMID:  
1283 20227217.
- 1284 13. Gardan L, Bollet C, Abughorrah M, Grimont F, Grimont PAD. DNA relatedness among the  
1285 pathovar strains of *Pseudomonas syringae* subsp *savastanoi* Janse (1982) and proposal of  
1286 *Pseudomonas savastanoi* sp-nov. *International Journal of Systematic Bacteriology.*  
1287 1992;42(4):606-12. PubMed PMID: ISI:A1992JR94000016.
- 1288 14. Gardan L, Shafik H, Belouin S, Broch R, Grimont F, Grimont PA. DNA relatedness among the  
1289 pathovars of *Pseudomonas syringae* and description of *Pseudomonas tremae* sp. nov. and  
1290 *Pseudomonas cannabina* sp. nov. (ex Sutic and Dowson 1959). *International Journal of*  
1291 *Systematic Bacteriology.* 1999;49(Pt 2):469-78.
- 1292 15. Janse JD, Rossi P, Angelucci L, Scortichini M, Derks JHJ, Akkermans ADL, et al. Reclassification  
1293 of *Pseudomonas syringae* pv *avellanae* as *Pseudomonas avellanae* (spec nov), the bacterium  
1294 causing canker of hazelnut (*Corylus avellana* L). *Syst Appl Microbiol.* 1996;19(4):589-95. PubMed  
1295 PMID: ISI:A1996WD41100011.
- 1296 16. Lelliott RA, Billing E, Hayward AC. A determinative scheme for the fluorescent plant pathogenic  
1297 pseudomonads. *J Appl Bacteriol.* 1966;29(3):470-89. Epub 1966/12/01. PubMed PMID: 5980915.
- 1298 17. Young JM. Taxonomy of *Pseudomonas syringae*. *J Plant Pathol.* 2010;92(1):S5-S14. PubMed  
1299 PMID: WOS:000282597500002.
- 1300 18. Baltrus DA, Nishimura MT, Romanchuk A, Chang JH, Mukhtar MS, Cherkis K, et al. Dynamic  
1301 evolution of pathogenicity revealed by sequencing and comparative genomics of 19

- 1302 *Pseudomonas syringae* isolates. PLoS Pathog. 2011;7(7):e1002132. doi:  
1303 10.1371/journal.ppat.1002132. PubMed PMID: 21799664; PubMed Central PMCID:  
1304 PMC3136466.
- 1305 19. O'Brien HE, Thakur S, Gong Y, Fung P, Zhang J, Yuan L, et al. Extensive remodeling of the  
1306 *Pseudomonas syringae* pv. *avellanae* type III secretome associated with two independent host  
1307 shifts onto hazelnut. BMC Microbiol. 2012;12:141. Epub 2012/07/18. doi: 10.1186/1471-2180-12-  
1308 141. PubMed PMID: 22800299; PubMed Central PMCID: PMC3411506.
- 1309 20. Sarkar SF, Gordon JS, Martin GB, Guttman DS. Comparative genomics of host-specific virulence  
1310 in *Pseudomonas syringae*. Genetics. 2006;174(4):1041-56. PubMed PMID: 16951068.
- 1311 21. Monteil CL, Cai R, Liu H, Llontop ME, Leman S, Studholme DJ, et al. Nonagricultural reservoirs  
1312 contribute to emergence and evolution of *Pseudomonas syringae* crop pathogens. New Phytol.  
1313 2013;199(3):800-11. Epub 2013/05/23. doi: 10.1111/nph.12316. PubMed PMID: 23692644.
- 1314 22. Monteil CL, Yahara K, Studholme DJ, Mageiros L, Meric G, Swingle B, et al. Population-genomic  
1315 insights into emergence, crop adaptation and dissemination of *Pseudomonas syringae*  
1316 pathogens. Microb Genom. 2016;2(10):e000089. Epub 2017/03/30. doi: 10.1099/mgen.0.000089.  
1317 PubMed PMID: 28348830; PubMed Central PMCID: PMC5359406.
- 1318 23. Sutcliffe IC, Trujillo ME, Goodfellow M. A call to arms for systematists: revitalising the purpose  
1319 and practises underpinning the description of novel microbial taxa. Antonie Leeuwenhoek.  
1320 2012;101(1):13-20. Epub 2011/11/01. doi: 10.1007/s10482-011-9664-0. PubMed PMID:  
1321 22038177.
- 1322 24. Fraser C, Alm EJ, Polz MF, Spratt BG, Hanage WP. The bacterial species challenge: making  
1323 sense of genetic and ecological diversity. Science. 2009;323(5915):741-6. Epub 2009/02/07. doi:  
1324 323/5915/741 [pii]  
1325 10.1126/science.1159388 [doi]. PubMed PMID: 19197054.
- 1326 25. Cohan FM. Genetic exchange and evolutionary divergence in prokaryotes. Trends in Ecology and  
1327 Evolution. 1994;9(5):175-80.
- 1328 26. Cohan FM. Bacterial species and speciation. Syst Biol. 2001;50(4):513-24. Epub 2002/07/16.  
1329 PubMed PMID: 12116650.
- 1330 27. Cohan FM. What are bacterial species? Annu Rev Microbiol. 2002;56:457-87. doi:  
1331 10.1146/annurev.micro.56.012302.160634. PubMed PMID: 12142474.



- 1332 28. Cohan FM. Towards a conceptual and operational union of bacterial systematics, ecology, and  
1333 evolution. *Philosophical Transactions of the Royal Society of London Series B-Biological*  
1334 *Sciences*. 2006;361(1475):1985-96. PubMed PMID: ISI:000241920600010.
- 1335 29. Cohan FM, Koeppel AF. The origins of ecological diversity in prokaryotes. *Curr Biol*.  
1336 2008;18(21):R1024-34. Epub 2008/11/13. doi: 10.1016/j.cub.2008.09.014. PubMed PMID:  
1337 19000803.
- 1338 30. Achtman M, Wagner M. Microbial diversity and the genetic nature of microbial species. *Nat Rev*  
1339 *Microbiol*. 2008;6(6):431-40. Epub 2008/05/08. doi: 10.1038/nrmicro1872. PubMed PMID:  
1340 18461076.
- 1341 31. Fraser C, Hanage WP, Spratt BG. Recombination and the nature of bacterial speciation. *Science*.  
1342 2007;315(5811):476-80. Epub 2007/01/27. doi: 315/5811/476 [pii]  
1343 10.1126/science.1127573. PubMed PMID: 17255503; PubMed Central PMCID: PMC2220085.
- 1344 32. Gogarten JP, Doolittle WF, Lawrence JG. Prokaryotic evolution in light of gene transfer. *Mol Biol*  
1345 *Evol*. 2002;19(12):2226-38. PubMed PMID: 12446813.
- 1346 33. Hanage WP, Fraser C, Spratt BG. Fuzzy species among recombinogenic bacteria. *BMC Biol*.  
1347 2005;3:6. Epub 2005/03/09. doi: 10.1186/1741-7007-3-6. PubMed PMID: 15752428; PubMed  
1348 Central PMCID: PMC554772.
- 1349 34. Hanage WP, Fraser C, Spratt BG. The impact of homologous recombination on the generation of  
1350 diversity in bacteria. *J Theor Biol*. 2006;239(2):210-9. Epub 2005/10/21. doi:  
1351 10.1016/j.jtbi.2005.08.035. PubMed PMID: 16236325.
- 1352 35. Lawrence JG. Gene transfer, speciation, and the evolution of bacterial genomes. *Curr Opin*  
1353 *Microbiol*. 1999;2(5):519-23. Epub 1999/10/06. PubMed PMID: 10508729.
- 1354 36. Ochman H, Lawrence JG, Groisman EA. Lateral gene transfer and the nature of bacterial  
1355 innovation. *Nature*. 2000;405(6784):299-304.
- 1356 37. Ochman H, Lerat E, Daubin V. Examining bacterial species under the specter of gene transfer  
1357 and exchange. *Proc Natl Acad Sci U S A*. 2005;102:6595-9. doi: DOI 10.1073/pnas.0502035102.  
1358 PubMed PMID: ISI:000229023700013.
- 1359 38. Polz MF, Alm EJ, Hanage WP. Horizontal gene transfer and the evolution of bacterial and  
1360 archaeal population structure. *Trends Genet*. 2013;29(3):170-5. Epub 2013/01/22. doi:

- 1361 10.1016/j.tig.2012.12.006. PubMed PMID: 23332119; PubMed Central PMCID:  
1362 PMCPMC3760709.
- 1363 39. Guttman DS. Natural Selection and Recombination in *Escherichia coli*. Stony Brook: State  
1364 University of New York at Stony Brook; 1994.
- 1365 40. Guttman DS, Dykhuizen DE. Clonal divergence in *Escherichia coli* as a result of recombination,  
1366 not mutation. *Science*. 1994;266(5189):1380-3. Epub Nov 25. PubMed PMID: 7973728.
- 1367 41. Cai R, Yan S, Liu H, Leman S, Vinatzer BA. Reconstructing host range evolution of bacterial plant  
1368 pathogens using *Pseudomonas syringae* pv. *tomato* and its close relatives as a model. *Infect*  
1369 *Genet Evol*. 2011;11(7):1738-51. doi: 10.1016/j.meegid.2011.07.012. PubMed PMID: 21802528.
- 1370 42. Yan S, Liu H, Mohr TJ, Jenrette J, Chiodini R, Zaccardelli M, et al. Role of recombination in the  
1371 evolution of the model plant pathogen *Pseudomonas syringae* pv. *tomato* DC3000, a very atypical  
1372 tomato strain. *Appl Environ Microbiol*. 2008;74(10):3171-81. Epub 2008/04/02. doi:  
1373 10.1128/AEM.00180-08. PubMed PMID: 18378665; PubMed Central PMCID: PMC2394945.
- 1374 43. Thakur S, Weir BS, Guttman DS. Phytopathogen Genome Announcement: Draft Genome  
1375 Sequences of 62 *Pseudomonas syringae* Type and Pathotype Strains. *Mol Plant Microbe Interact*.  
1376 2016;29(4):243-6. Epub 2016/02/18. doi: 10.1094/mpmi-01-16-0013-ta. PubMed PMID:  
1377 26883489.
- 1378 44. Bull CT, De Boer SH, Denny TP, Firrao G, Fischer-Le Saux M, Saddler GS, et al. Demystifying  
1379 the nomenclature of bacterial plant pathogens. *J Plant Pathol*. 2008;90(3):403-17. PubMed PMID:  
1380 WOS:000261237100001.
- 1381 45. Bolger AM, Lohse M, Usadel B. Trimmomatic: a flexible trimmer for Illumina sequence data.  
1382 *Bioinformatics*. 2014;30(15):2114-20. Epub 2014/04/04. doi: 10.1093/bioinformatics/btu170.  
1383 PubMed PMID: 24695404; PubMed Central PMCID: PMCPMC4103590.
- 1384 46. Thakur S, Guttman DS. A De-Novo Genome Analysis Pipeline (DeNoGAP) for large-scale  
1385 comparative prokaryotic genomics studies. *BMC Bioinformatics*. 2016;17(1):260. Epub  
1386 2016/07/02. doi: 10.1186/s12859-016-1142-2. PubMed PMID: 27363390; PubMed Central  
1387 PMCID: PMCPMC4929753.
- 1388 47. Delcher AL, Harmon D, Kasif S, White O, Salzberg SL. Improved microbial gene identification with  
1389 GLIMMER. *Nucleic Acids Res*. 1999;27(23):4636-41.

- 1390 48. Rho M, Tang H, Ye Y. FragGeneScan: predicting genes in short and error-prone reads. *Nucleic*  
1391 *Acids Res.* 2010. Epub 2010/09/02. doi: gkq747 [pii]  
1392 10.1093/nar/gkq747. PubMed PMID: 20805240.
- 1393 49. Besemer J, Borodovsky M. GeneMark: web software for gene finding in prokaryotes, eukaryotes  
1394 and viruses. *Nucleic Acids Res.* 2005;33(Web Server issue):W451-4. Epub 2005/06/28. doi:  
1395 10.1093/nar/gki487. PubMed PMID: 15980510; PubMed Central PMCID: PMCPMC1160247.
- 1396 50. Hyatt D, Chen GL, Locascio PF, Land ML, Larimer FW, Hauser LJ. Prodigal: prokaryotic gene  
1397 recognition and translation initiation site identification. *BMC Bioinformatics.* 2010;11:119. Epub  
1398 2010/03/10. doi: 10.1186/1471-2105-11-119. PubMed PMID: 20211023; PubMed Central PMCID:  
1399 PMCPMC2848648.
- 1400 51. Boutet E, Lieberherr D, Tognolli M, Schneider M, Bairoch A. UniProtKB/Swiss-Prot. *Methods Mol*  
1401 *Biol.* 2007;406:89-112. Epub 2008/02/22. PubMed PMID: 18287689.
- 1402 52. Jones P, Binns D, Chang HY, Fraser M, Li W, McAnulla C, et al. InterProScan 5: genome-scale  
1403 protein function classification. *Bioinformatics.* 2014;30(9):1236-40. Epub 2014/01/24. doi:  
1404 10.1093/bioinformatics/btu031. PubMed PMID: 24451626; PubMed Central PMCID:  
1405 PMCPMC3998142.
- 1406 53. Galperin MY, Makarova KS, Wolf YI, Koonin EV. Expanded microbial genome coverage and  
1407 improved protein family annotation in the COG database. *Nucleic Acids Res.* 2015;43(Database  
1408 issue):D261-9. Epub 2014/11/28. doi: 10.1093/nar/gku1223. PubMed PMID: 25428365; PubMed  
1409 Central PMCID: PMCPMC4383993.
- 1410 54. Zhao Y, Jia X, Yang J, Ling Y, Zhang Z, Yu J, et al. PanGP: a tool for quickly analyzing bacterial  
1411 pan-genome profile. *Bioinformatics.* 2014;30(9):1297-9. Epub 2014/01/15. doi:  
1412 10.1093/bioinformatics/btu017. PubMed PMID: 24420766; PubMed Central PMCID:  
1413 PMCPMC3998138.
- 1414 55. Snipen L, Liland KH. micropan: an R-package for microbial pan-genomics. *BMC Bioinformatics.*  
1415 2015;16:79. Epub 2015/04/19. doi: 10.1186/s12859-015-0517-0. PubMed PMID: 25888166;  
1416 PubMed Central PMCID: PMCPMC4375852.
- 1417 56. Denton JF, Lugo-Martinez J, Tucker AE, Schrider DR, Warren WC, Hahn MW. Extensive error in  
1418 the number of genes inferred from draft genome assemblies. *PLoS Comput Biol.*

- 1419 2014;10(12):e1003998. Epub 2014/12/05. doi: 10.1371/journal.pcbi.1003998. PubMed PMID:  
1420 25474019; PubMed Central PMCID: PMC4256071.
- 1421 57. Baltrus DA, Dougherty K, Beckstrom-Sternberg SM, Beckstrom-Sternberg JS, Foster JT.  
1422 Incongruence between multi-locus sequence analysis (MLSA) and whole-genome-based  
1423 phylogenies: *Pseudomonas syringae* pathovar pisi as a cautionary tale. *Mol Plant Pathol*.  
1424 2014;15(5):461-5. doi: 10.1111/mpp.12103. PubMed PMID: 24224664.
- 1425 58. Nowell RW, Green S, Laue BE, Sharp PM. The extent of genome flux and its role in the  
1426 differentiation of bacterial lineages. *Genome Biol Evol*. 2014. doi: 10.1093/gbe/evu123. PubMed  
1427 PMID: 24923323.
- 1428 59. Charif D, Thioulouse J, Lobry JR, Perriere G. Online synonymous codon usage analyses with the  
1429 ade4 and seqinR packages. *Bioinformatics*. 2005;21(4):545-7. Epub 2004/09/18. doi:  
1430 10.1093/bioinformatics/bti037. PubMed PMID: 15374859.
- 1431 60. Linz B, Schenker M, Zhu PX, Achtman M. Frequent interspecific genetic exchange between  
1432 commensal *Neisseriae* and *Neisseria meningitidis*. *Mol Microbiol*. 2000;36(5):1049-58. doi: DOI  
1433 10.1046/j.1365-2958.2000.01932.x. PubMed PMID: WOS:000087358800006.
- 1434 61. Zhou JJ, Bowler LD, Spratt BG. Interspecies recombination, and phylogenetic distortions, within  
1435 the glutamine synthetase and shikimate dehydrogenase genes of *Neisseria meningitidis* and  
1436 commensal *Neisseria species*. *Mol Microbiol*. 1997;23(4):799-812. doi: DOI 10.1046/j.1365-  
1437 2958.1997.2681633.x. PubMed PMID: WOS:A1997WH73800016.
- 1438 62. Yu D, Jin Y, Yin Z, Ren H, Zhou W, Liang L, et al. A genome-wide identification of genes  
1439 undergoing recombination and positive selection in *Neisseria*. *Biomed Res Int*.  
1440 2014;2014:815672. Epub 2014/09/03. doi: 10.1155/2014/815672. PubMed PMID: 25180194;  
1441 PubMed Central PMCID: PMC4142384.
- 1442 63. Chen L, Zheng D, Liu B, Yang J, Jin Q. VFDB 2016: hierarchical and refined dataset for big data  
1443 analysis--10 years on. *Nucleic Acids Res*. 2016;44(D1):D694-7. Epub 2015/11/19. doi:  
1444 10.1093/nar/gkv1239. PubMed PMID: 26578559; PubMed Central PMCID: PMC4702877.
- 1445 64. Alfano JR, Charkowski AO, Deng WL, Badel JL, Petnicki-Ocwieja T, van Dijk K, et al. The  
1446 *Pseudomonas syringae* Hrp pathogenicity island has a tripartite mosaic structure composed of a  
1447 cluster of type III secretion genes bounded by exchangeable effector and conserved effector loci  
1448 that contribute to parasitic fitness and pathogenicity in plants. *Proc Natl Acad Sci U S A*.  
1449 2000;97(9):4856-61. doi: DOI 10.1073/pnas.97.9.4856. PubMed PMID: WOS:000086703000083.

- 1450 65. Buell CR, Joardar V, Lindeberg M, Selengut J, Paulsen IT, Gwinn ML, et al. The complete  
1451 genome sequence of the Arabidopsis and tomato pathogen *Pseudomonas syringae* pv. tomato  
1452 DC3000. *Proc Natl Acad Sci U S A*. 2003;100(18):10181-6. Epub 2003/08/21. doi:  
1453 10.1073/pnas.1731982100. PubMed PMID: 12928499; PubMed Central PMCID:  
1454 PMC193536.
- 1455 66. Araki H, Innan H, Kreitman M, Bergelson J. Molecular evolution of pathogenicity-island genes in  
1456 *Pseudomonas viridiflava*. *Genetics*. 2007;177(2):1031-41. Epub 2007/08/28. doi:  
1457 10.1534/genetics.107.077925. PubMed PMID: 17720907; PubMed Central PMCID:  
1458 PMC2034611.
- 1459 67. Araki H, Tian D, Goss EM, Jakob K, Halldorsdottir SS, Kreitman M, et al. Presence/absence  
1460 polymorphism for alternative pathogenicity islands in *Pseudomonas viridiflava*, a pathogen of  
1461 *Arabidopsis*. *Proc Natl Acad Sci U S A*. 2006;103(15):5887-92. doi: 10.1073/pnas.0601431103.  
1462 PubMed PMID: 16581904; PubMed Central PMCID: PMC1458668.
- 1463 68. Mohr TJ, Liu H, Yan S, Morris CE, Castillo JA, Jelenska J, et al. Naturally occurring  
1464 nonpathogenic isolates of the plant pathogen *Pseudomonas syringae* lack a type III secretion  
1465 system and effector gene orthologues. *J Bacteriol*. 2008;190(8):2858-70. doi: 10.1128/JB.01757-  
1466 07. PubMed PMID: 18263729; PubMed Central PMCID: PMC2293242.
- 1467 69. Demba Diallo M, Monteil CL, Vinatzer BA, Clarke CR, Glaux C, Guilbaud C, et al. *Pseudomonas*  
1468 *syringae* naturally lacking the canonical type III secretion system are ubiquitous in nonagricultural  
1469 habitats, are phylogenetically diverse and can be pathogenic. *ISME J*. 2012;6(7):1325-35. Epub  
1470 2012/01/13. doi: 10.1038/ismej.2011.202. PubMed PMID: 22237542; PubMed Central PMCID:  
1471 PMC3379638.
- 1472 70. Joardar V, Lindeberg M, Jackson RW, Selengut J, Dodson R, Brinkac LM, et al. Whole-genome  
1473 sequence analysis of *Pseudomonas syringae* pv. *phaseolicola* 1448A reveals divergence among  
1474 pathovars in genes involved in virulence and transposition. *J Bacteriol*. 2005;187(18):6488-98.  
1475 Epub 2005/09/15. doi: 10.1128/jb.187.18.6488-6498.2005. PubMed PMID: 16159782; PubMed  
1476 Central PMCID: PMC1236638.
- 1477 71. Clarke CR, Cai R, Studholme DJ, Guttman DS, Vinatzer BA. *Pseudomonas syringae* strains  
1478 naturally lacking the classical *P. syringae* *hrp/hrc* locus are common leaf colonizers equipped with  
1479 an atypical type III secretion system. *Mol Plant Microbe Interact*. 2010;23(2):198-210. Epub  
1480 2010/01/13. doi: 10.1094/MPMI-23-2-0198. PubMed PMID: 20064063.

- 1481 72. Gazi AD, Sarris PF, Fadouloglou VE, Charova SN, Mathioudakis N, Panopoulos NJ, et al.  
1482 Phylogenetic analysis of a gene cluster encoding an additional, rhizobial-like type III secretion  
1483 system that is narrowly distributed among *Pseudomonas syringae* strains. BMC Microbiol.  
1484 2012;12:188. Epub 2012/09/04. doi: 10.1186/1471-2180-12-188. PubMed PMID: 22937899;  
1485 PubMed Central PMCID: PMCPMC3574062.
- 1486 73. Morris CE, Sands DC, Vanneste JL, Montarry J, Oakley B, Guilbaud C, et al. Inferring the  
1487 evolutionary history of the plant pathogen *Pseudomonas syringae* from its biogeography in  
1488 headwaters of rivers in North America, Europe, and New Zealand. MBio. 2010;1(3):e00107-10.  
1489 doi: 10.1128/mBio.00107-10. PubMed PMID: 20802828; PubMed Central PMCID: PMC2925074.
- 1490 74. Morris CE, Monteil CL, Berge O. The life history of *Pseudomonas syringae*: linking agriculture to  
1491 earth system processes. Annu Rev Phytopathol. 2013;51:85-104. Epub 2013/05/15. doi:  
1492 10.1146/annurev-phyto-082712-102402. PubMed PMID: 23663005.
- 1493 75. Dong X, Lu X, Zhang Z. BEAN 2.0: an integrated web resource for the identification and functional  
1494 analysis of type III secreted effectors. Database (Oxford). 2015;2015:bav064. Epub 2015/06/30.  
1495 doi: 10.1093/database/bav064. PubMed PMID: 26120140; PubMed Central PMCID:  
1496 PMCPMC4483310.
- 1497 76. O'Brien HE, Desveaux D, Guttman DS. Next-generation genomics of *Pseudomonas syringae*.  
1498 Curr Opin Microbiol. 2011;14(1):24-30. Epub 2011/01/15. doi: 10.1016/j.mib.2010.12.007.  
1499 PubMed PMID: 21233007.
- 1500 77. Lindeberg M, Cartinhour S, Myers CR, Schechter LM, Schneider DJ, Collmer A. Closing the circle  
1501 on the discovery of genes encoding Hrp regulon members and type III secretion system effectors  
1502 in the genomes of three model *Pseudomonas syringae* strains. Mol Plant Microbe Interact.  
1503 2006;19(11):1151-8. PubMed PMID: ISI:000241424300001.
- 1504 78. Vencato M, Tian F, Alfano JR, Buell R, Cartinhour S, DeClerck G, et al. Bioinformatics-enabled  
1505 inventory of the Hrp regulon and type III secretion system effector proteins of *Pseudomonas*  
1506 *syringae* pv. phaseolicola 1448A. Mol Plant Microbe Interact. 2006;19(11):1193-206. PubMed  
1507 PMID: 17073302.
- 1508 79. Ferreira AO, Myers CR, Gordon JS, Martin GB, Vencato M, Collmer A, et al. Whole-genome  
1509 expression profiling defines the HrpL regulon of *Pseudomonas syringae* pv. tomato DC3000,  
1510 allows de novo reconstruction of the Hrp cis element, and identifies novel coregulated genes. Mol  
1511 Plant Microbe Interact. 2006;19(11):1167-79. PubMed PMID: ISI:000241424300003.



- 1512 80. Bender CL, Alarcón-Chaidez F, Gross DC. *Pseudomonas syringae* phytotoxins: mode of action,  
1513 regulation, and biosynthesis by peptide and polyketide synthetases. *Microbiological and Molecular*  
1514 *Biology Reviews*. 1999;63(2):266-92.
- 1515 81. Arrebola E, Cazorla FM, Romero D, Perez-Garcia A, de Vicente A. A nonribosomal peptide  
1516 synthetase gene (*mgoA*) of *Pseudomonas syringae* pv. *syringae* is involved in mangotoxin  
1517 biosynthesis and is required for full virulence. *Mol Plant Microbe Interact*. 2007;20(5):500-9. Epub  
1518 2007/05/18. doi: 10.1094/mpmi-20-5-0500. PubMed PMID: 17506328.
- 1519 82. Carrion VJ, Gutierrez-Barranquero JA, Arrebola E, Bardaji L, Codina JC, de Vicente A, et al. The  
1520 mangotoxin biosynthetic operon (*mbo*) is specifically distributed within *Pseudomonas syringae*  
1521 genomospecies 1 and was acquired only once during evolution. *Appl Environ Microbiol*.  
1522 2013;79(3):756-67. Epub 2012/11/13. doi: 10.1128/aem.03007-12. PubMed PMID: 23144138;  
1523 PubMed Central PMCID: PMC3568555.
- 1524 83. Martinez-Garcia PM, Rodriguez-Palenzuela P, Arrebola E, Carrion VJ, Gutierrez-Barranquero JA,  
1525 Perez-Garcia A, et al. Bioinformatics analysis of the complete genome sequence of the mango  
1526 tree pathogen *Pseudomonas syringae* pv. *syringae* UMAF0158 reveals traits relevant to virulence  
1527 and epiphytic lifestyle. *PLoS One*. 2015;10(8):e0136101. Epub 2015/08/28. doi:  
1528 10.1371/journal.pone.0136101. PubMed PMID: 26313942; PubMed Central PMCID:  
1529 PMC4551802.
- 1530 84. Ashburner M, Ball CA, Blake JA, Botstein D, Butler H, Cherry JM, et al. Gene ontology: tool for  
1531 the unification of biology. The Gene Ontology Consortium. *Nat Genet*. 2000;25(1):25-9. Epub  
1532 2000/05/10. doi: 10.1038/75556. PubMed PMID: 10802651; PubMed Central PMCID:  
1533 PMC3037419.
- 1534 85. Conesa A, Gotz S, Garcia-Gomez JM, Terol J, Talon M, Robles M. Blast2GO: a universal tool for  
1535 annotation, visualization and analysis in functional genomics research. *Bioinformatics*.  
1536 2005;21(18):3674-6. Epub 2005/08/06. doi: 10.1093/bioinformatics/bti610. PubMed PMID:  
1537 16081474.
- 1538 86. Murrell B, Moola S, Mabona A, Weighill T, Sheward D, Kosakovsky Pond SL, et al. FUBAR: a  
1539 fast, unconstrained bayesian approximation for inferring selection. *Mol Biol Evol*.  
1540 2013;30(5):1196-205. Epub 2013/02/20. doi: 10.1093/molbev/mst030. PubMed PMID: 23420840;  
1541 PubMed Central PMCID: PMC3670733.



- 1542 87. Pond SLK, Posada D, Gravenor MB, Woelk CH, Frost SDW. GARD: a genetic algorithm for  
1543 recombination detection. *Bioinformatics*. 2006;22(24):3096-8. doi: DOI  
1544 10.1093/bioinformatics/btl474. PubMed PMID: WOS:000242715200019.
- 1545 88. Shimodaira H, Hasegawa M. CONSEL: for assessing the confidence of phylogenetic tree  
1546 selection. *Bioinformatics*. 2001;17(12):1246-124
- 1547 7.
- 1548 89. Sawyer S. Statistical tests for detecting gene conversion. *Mol Biol Evol*. 1989;6(5):526-38. Epub  
1549 1989/09/01. PubMed PMID: 2677599.
- 1550 90. Bruen TC, Philippe H, Bryant D. A simple and robust statistical test for detecting the presence of  
1551 recombination. *Genetics*. 2006;172(4):2665-81. Epub 2006/02/21. doi:  
1552 10.1534/genetics.105.048975. PubMed PMID: 16489234; PubMed Central PMCID:  
1553 PMCPMC1456386.
- 1554 91. Hudson RR, Kaplan NL. Statistical properties of the number of recombination events in the history  
1555 of a sample of DNA sequences. *Genetics*. 1985;111(1):147-64. PubMed PMID: 4029609;  
1556 PubMed Central PMCID: PMC1202594.
- 1557 92. Orsi RH, Sun Q, Wiedmann M. Genome-wide analyses reveal lineage specific contributions of  
1558 positive selection and recombination to the evolution of *Listeria monocytogenes*. *BMC Evol Biol*.  
1559 2008;8:233. Epub 2008/08/14. doi: 10.1186/1471-2148-8-233. PubMed PMID: 18700032;  
1560 PubMed Central PMCID: PMCPMC2532693.
- 1561 93. Wiuf C, Christensen T, Hein J. A simulation study of the reliability of recombination detection  
1562 methods. *Mol Biol Evol*. 2001;18(10):1929-39. PubMed PMID: ISI:000171342700008.
- 1563 94. Majewski J, Cohan FM. The effect of mismatch repair and heteroduplex formation on sexual  
1564 isolation in *Bacillus*. *Genetics*. 1998;148(1):13-8. PubMed PMID: 9475717; PubMed Central  
1565 PMCID: PMC1459767.
- 1566 95. Didelot X, Maiden MC. Impact of recombination on bacterial evolution. *Trends Microbiol*.  
1567 2010;18(7):315-22. Epub 2010/05/11. doi: 10.1016/j.tim.2010.04.002. PubMed PMID: 20452218;  
1568 PubMed Central PMCID: PMCPMC3985120.
- 1569 96. Cadillo-Quiroz H, Didelot X, Held NL, Herrera A, Darling A, Reno ML, et al. Patterns of gene flow  
1570 define species of thermophilic Archaea. *PLoS Biol*. 2012;10(2):e1001265. Epub 2012/03/01. doi:

- 1571 10.1371/journal.pbio.1001265. PubMed PMID: 22363207; PubMed Central PMCID:  
1572 PMCPMC3283564.
- 1573 97. Mott GA, Thakur S, Smakowska E, Wang PW, Belkhadir Y, Desveaux D, et al. Genomic screens  
1574 identify a new phytobacterial microbe-associated molecular pattern and the cognate *Arabidopsis*  
1575 receptor-like kinase that mediates its immune elicitation. *Genome Biol.* 2016;17:98. Epub  
1576 2016/05/11. doi: 10.1186/s13059-016-0955-7. PubMed PMID: 27160854; PubMed Central  
1577 PMCID: PMCPMC4862170.
- 1578 98. Mosquera-Rendon J, Rada-Bravo AM, Cardenas-Brito S, Corredor M, Restrepo-Pineda E,  
1579 Benitez-Paez A. Pangenome-wide and molecular evolution analyses of the *Pseudomonas*  
1580 *aeruginosa* species. *BMC Genomics.* 2016;17:45. Epub 2016/01/13. doi: 10.1186/s12864-016-  
1581 2364-4. PubMed PMID: 26754847; PubMed Central PMCID: PMCPMC4710005.
- 1582 99. Mann RA, Smits TH, Buhlmann A, Blom J, Goesmann A, Frey JE, et al. Comparative genomics of  
1583 12 strains of *Erwinia amylovora* identifies a pan-genome with a large conserved core. *PLoS One.*  
1584 2013;8(2):e55644. Epub 2013/02/15. doi: 10.1371/journal.pone.0055644. PubMed PMID:  
1585 23409014; PubMed Central PMCID: PMCPMC3567147.
- 1586 100. Remenant B, Coupat-Goutaland B, Guidot A, Cellier G, Wicker E, Allen C, et al. Genomes of  
1587 three tomato pathogens within the *Ralstonia solanacearum* species complex reveal significant  
1588 evolutionary divergence. *BMC Genomics.* 2010;11:379. Epub 2010/06/17. doi: 10.1186/1471-  
1589 2164-11-379. PubMed PMID: 20550686; PubMed Central PMCID: PMCPMC2900269.
- 1590 101. Rouli L, Merhej V, Fournier PE, Raoult D. The bacterial pangenome as a new tool for analysing  
1591 pathogenic bacteria. *New Microbes New Infect.* 2015;7:72-85. Epub 2015/10/07. doi:  
1592 10.1016/j.nmni.2015.06.005. PubMed PMID: 26442149; PubMed Central PMCID:  
1593 PMCPMC4552756.
- 1594 102. Hao W, Golding GB. The fate of laterally transferred genes: life in the fast lane to adaptation or  
1595 death. *Genome Res.* 2006;16(5):636-43. Epub 2006/05/03. doi: 10.1101/gr.4746406. PubMed  
1596 PMID: 16651664; PubMed Central PMCID: PMCPMC1457040.
- 1597 103. Shapiro BJ, Friedman J, Cordero OX, Preheim SP, Timberlake SC, Szabo G, et al. Population  
1598 genomics of early events in the ecological differentiation of bacteria. *Science.* 2012;336(6077):48-  
1599 51. Epub 2012/04/12. doi: 10.1126/science.1218198. PubMed PMID: 22491847; PubMed Central  
1600 PMCID: PMC3337212.

- 1601 104. Kettler GC, Martiny AC, Huang K, Zucker J, Coleman ML, Rodrigue S, et al. Patterns and  
1602 implications of gene gain and loss in the evolution of *Prochlorococcus*. *PLoS Genet*.  
1603 2007;3(12):e231. Epub 2007/12/28. doi: 10.1371/journal.pgen.0030231. PubMed PMID:  
1604 18159947; PubMed Central PMCID: PMCPMC2151091.
- 1605 105. Joly M, Attard E, Sancelme M, Deguillaume L, Guilbaud C, Morris CE, et al. Ice nucleation activity  
1606 of bacteria isolated from cloud water. *Atmos Environ*. 2013;70:392-400. doi:  
1607 <http://dx.doi.org/10.1016/j.atmosenv.2013.01.027>.
- 1608 106. Knodler LA, Celli J, Hardt WD, Vallance BA, Yip C, Finlay BB. *Salmonella* effectors within a single  
1609 pathogenicity island are differentially expressed and translocated by separate type III secretion  
1610 systems. *Mol Microbiol*. 2002;43(5):1089-103. PubMed PMID: ISI:000174774100003.
- 1611 107. Rainbow L, Hart CA, Winstanley G. Distribution of type III secretion gene clusters in *Burkholderia*  
1612 *pseudomallei*, *B. thailandensis* and *B. mallei*. *J Med Microbiol*. 2002;51(5):374-84. PubMed PMID:  
1613 ISI:000175190300002.
- 1614 108. Buttner D. Protein export according to schedule: architecture, assembly, and regulation of type III  
1615 secretion systems from plant- and animal-pathogenic bacteria. *Microbiol Mol Biol Rev*.  
1616 2012;76(2):262-310. Epub 2012/06/13. doi: 10.1128/MMBR.05017-11. PubMed PMID: 22688814;  
1617 PubMed Central PMCID: PMCPMC3372255.
- 1618 109. Guttman DS, Gropp SJ, Morgan RL, Wang PW. Diversifying selection drives the evolution of the  
1619 type III secretion system pilus of *Pseudomonas syringae*. *Mol Biol Evol*. 2006;23(12):2342-54.  
1620 Epub 2006/09/05. doi: 10.1093/molbev/msl103. PubMed PMID: 16950758.
- 1621 110. Sawada H, Suzuki F, Matsuda I, Saitou N. Phylogenetic analysis of *Pseudomonas syringae*  
1622 pathovars suggests the horizontal gene transfer of *argK* and the evolutionary stability of *hrp* gene  
1623 cluster. *J Mol Evol*. 1999;49(5):627-44. Epub 1999/11/07. PubMed PMID: 10552044.
- 1624 111. Lindeberg M, Cunnac S, Collmer A. *Pseudomonas syringae* type III effector repertoires: last  
1625 words in endless arguments. *Trends Microbiol*. 2012;20(4):199-208. Epub 2012/02/22. doi:  
1626 10.1016/j.tim.2012.01.003. PubMed PMID: 22341410.
- 1627 112. Ma W, Dong F, Stavrinides J, Guttman DS. Diversification of a type III effector family via both  
1628 pathoadaptation and horizontal transfer in response to a coevolutionary arms race. *PLoS Genet*.  
1629 2006;2(12):2131-42. PubMed PMID: 17194219.

- 1630 113. Ma W, Guttman DS. Evolution of prokaryotic and eukaryotic virulence effectors. *Curr Opin Plant*  
1631 *Biol.* 2008;11(4):412-9. Epub 2008/07/01. doi: 10.1016/j.pbi.2008.05.001. PubMed PMID:  
1632 18585954.
- 1633 114. Stavrinides J, Ma W, Guttman DS. Terminal reassortment drives the quantum evolution of type III  
1634 effectors in bacterial pathogens. *PLoS Path.* 2006;2(10):e104. PubMed PMID: 17040127.
- 1635 115. Dixit PD, Pang TY, Maslov S. Recombination-driven genome evolution and stability of bacterial  
1636 species. *Genetics.* 2017;207(1):281-95. Epub 2017/07/29. doi: 10.1534/genetics.117.300061.  
1637 PubMed PMID: 28751420.
- 1638 116. Hanage WP, Spratt BG, Turner KM, Fraser C. Modelling bacterial speciation. *Philos Trans R Soc*  
1639 *Lond B Biol Sci.* 2006;361(1475):2039-44. Epub 2006/10/26. doi: 10.1098/rstb.2006.1926.  
1640 PubMed PMID: 17062418; PubMed Central PMCID: PMC1764933.
- 1641 117. Cai R, Lewis J, Yan S, Liu H, Clarke CR, Campanile F, et al. The plant pathogen *Pseudomonas*  
1642 *syringae* pv. *tomato* is genetically monomorphic and under strong selection to evade tomato  
1643 immunity. *PLoS Pathog.* 2011;7(8):e1002130. doi: 10.1371/journal.ppat.1002130. PubMed PMID:  
1644 21901088; PubMed Central PMCID: PMC3161960.
- 1645 118. Andrews TD, Gojobori T. Strong positive selection and recombination drive the antigenic variation  
1646 of the PilE protein of the human pathogen *Neisseria meningitidis*. *Genetics.* 2004;166(1):25-32.  
1647 Epub 2004/03/17. PubMed PMID: 15020403; PubMed Central PMCID: PMCPMC1470718.
- 1648 119. Bull CT, Koike ST. Practical benefits of knowing the enemy: modern molecular tools for  
1649 diagnosing the etiology of bacterial diseases and understanding the taxonomy and diversity of  
1650 plant-pathogenic bacteria. *Annu Rev Phytopathol.* 2015;53:157-80. Epub 2015/05/24. doi:  
1651 10.1146/annurev-phyto-080614-120122. PubMed PMID: 26002289.
- 1652 120. Young JM. An overview of bacterial nomenclature with special reference to plant pathogens. *Syst*  
1653 *Appl Microbiol.* 2008;31(6-8):405-24. Epub 2008/11/26. doi: 10.1016/j.syapm.2008.09.005.  
1654 PubMed PMID: 19026503.
- 1655 121. Vos M. A species concept for bacteria based on adaptive divergence. *Trends Microbiol.*  
1656 2011;19(1):1-7. Epub 2010/11/13. doi: 10.1016/j.tim.2010.10.003. PubMed PMID: 21071229.
- 1657 122. Barraclough TG, Balbi KJ, Ellis RJ. Evolving Concepts of Bacterial Species. *Evolutionary Biology.*  
1658 2012;39(2):148-57. doi: 10.1007/s11692-012-9181-8.

- 1659 123. Markowitz VM, Mavromatis K, Ivanova NN, Chen IM, Chu K, Kyrpides NC. IMG ER: a system for  
1660 microbial genome annotation expert review and curation. *Bioinformatics*. 2009;25(17):2271-8.  
1661 Epub 2009/06/30. doi: 10.1093/bioinformatics/btp393. PubMed PMID: 19561336.
- 1662 124. Markowitz VM, Chen IM, Palaniappan K, Chu K, Szeto E, Grechkin Y, et al. IMG: the Integrated  
1663 Microbial Genomes database and comparative analysis system. *Nucleic Acids Res*.  
1664 2012;40(Database issue):D115-22. Epub 2011/12/24. doi: 10.1093/nar/gkr1044. PubMed PMID:  
1665 22194640; PubMed Central PMCID: PMC3245086.
- 1666 125. Wattam AR, Abraham D, Dalay O, Disz TL, Driscoll T, Gabbard JL, et al. PATRIC, the bacterial  
1667 bioinformatics database and analysis resource. *Nucleic Acids Res*. 2014;42(Database  
1668 issue):D581-91. Epub 2013/11/15. doi: 10.1093/nar/gkt1099. PubMed PMID: 24225323; PubMed  
1669 Central PMCID: PMC3965095.
- 1670 126. Andrews SC. FastQC v0.11.3 <http://www.bioinformatics.babraham.ac.uk/projects/fastqc/> 2015.  
1671 Available from: <http://www.bioinformatics.babraham.ac.uk/projects/fastqc/>.
- 1672 127. Delcher AL, Bratke KA, Powers EC, Salzberg SL. Identifying bacterial genes and endosymbiont  
1673 DNA with Glimmer. *Bioinformatics*. 2007;23(6):673-9. Epub 2007/01/24. doi:  
1674 10.1093/bioinformatics/btm009. PubMed PMID: 17237039; PubMed Central PMCID:  
1675 PMC32387122.
- 1676 128. Tatusov RL, Galperin MY, Natale DA, Koonin EV. The COG database: a tool for genome-scale  
1677 analysis of protein functions and evolution. *Nucleic Acids Res*. 2000;28(1):33-6. Epub 1999/12/11.  
1678 doi: gkd013 [pii]. PubMed PMID: 10592175; PubMed Central PMCID: PMC102395.
- 1679 129. Eddy SR. Accelerated Profile HMM Searches. *PLoS Comput Biol*. 2011;7(10):e1002195. Epub  
1680 2011/11/01. doi: 10.1371/journal.pcbi.1002195. PubMed PMID: 22039361; PubMed Central  
1681 PMCID: PMC3197634.
- 1682 130. Enright AJ, Van Dongen S, Ouzounis CA. An efficient algorithm for large-scale detection of  
1683 protein families. *Nucleic Acids Res*. 2002;30(7):1575-84. Epub 2002/03/28. PubMed PMID:  
1684 11917018; PubMed Central PMCID: PMC101833.
- 1685 131. Pellegrini M, Marcotte EM, Thompson MJ, Eisenberg D, Yeates TO. Assigning protein functions  
1686 by comparative genome analysis: Protein phylogenetic profiles. *Proc Natl Acad Sci U S A*.  
1687 1999;96(8):4285-8. PubMed PMID: ISI:000079766500017.

- 1688 132. Lassmann T, Frings O, Sonnhammer EL. Kalign2: high-performance multiple alignment of protein  
1689 and nucleotide sequences allowing external features. *Nucleic Acids Res.* 2009;37(3):858-65.  
1690 Epub 2008/12/24. doi: 10.1093/nar/gkn1006. PubMed PMID: 19103665; PubMed Central PMCID:  
1691 PMCPMC2647288.
- 1692 133. Price MN, Dehal PS, Arkin AP. FastTree 2--approximately maximum-likelihood trees for large  
1693 alignments. *PLoS One.* 2010;5(3):e9490. Epub 2010/03/13. doi: 10.1371/journal.pone.0009490.  
1694 PubMed PMID: 20224823; PubMed Central PMCID: PMCPMC2835736.
- 1695 134. Hordijk W, Gascuel O. Improving the efficiency of SPR moves in phylogenetic tree search  
1696 methods based on maximum likelihood. *Bioinformatics.* 2005;21(24):4338-47. Epub 2005/10/20.  
1697 doi: 10.1093/bioinformatics/bti713. PubMed PMID: 16234323.
- 1698 135. Price MN, Dehal PS, Arkin AP. FastTree: computing large minimum evolution trees with profiles  
1699 instead of a distance matrix. *Mol Biol Evol.* 2009;26(7):1641-50. Epub 2009/04/21. doi:  
1700 10.1093/molbev/msp077. PubMed PMID: 19377059; PubMed Central PMCID:  
1701 PMCPMC2693737.
- 1702 136. Shimodaira H, Hasegawa M. Multiple comparisons of log-likelihoods with applications to  
1703 phylogenetic inference. *Mol Biol Evol.* 1999;16(8):1114-6. PubMed PMID: ISI:000081925400012.
- 1704 137. Feil H, Feil WS, Chain P, Larimer F, DiBartolo G, Copeland A, et al. Comparison of the complete  
1705 genome sequences of *Pseudomonas syringae* pv. *syringae* B728a and pv. *tomato* DC3000. *Proc*  
1706 *Natl Acad Sci U S A.* 2005;102(31):11064-9. Epub 2005/07/27. doi: 10.1073/pnas.0504930102.  
1707 PubMed PMID: 16043691; PubMed Central PMCID: PMCPMC1182459.
- 1708 138. Arnold R, Brandmaier S, Kleine F, Tischler P, Heinz E, Behrens S, et al. Sequence-based  
1709 prediction of type III secreted proteins. *PLoS Pathog.* 2009;5(4):e1000376. doi:  
1710 10.1371/journal.ppat.1000376. PubMed PMID: 19390696; PubMed Central PMCID:  
1711 PMC2669295.
- 1712 139. Chen L, Xiong Z, Sun L, Yang J, Jin Q. VFDB 2012 update: toward the genetic diversity and  
1713 molecular evolution of bacterial virulence factors. *Nucleic Acids Res.* 2012;40(Database  
1714 issue):D641-5. Epub 2011/11/10. doi: 10.1093/nar/gkr989. PubMed PMID: 22067448; PubMed  
1715 Central PMCID: PMCPMC3245122.
- 1716 140. Chen L, Yang J, Yu J, Yao Z, Sun L, Shen Y, et al. VFDB: a reference database for bacterial  
1717 virulence factors. *Nucleic Acids Res.* 2005;33(Database issue):D325-8. Epub 2004/12/21. doi:  
1718 10.1093/nar/gki008. PubMed PMID: 15608208; PubMed Central PMCID: PMCPMC539962.

- 1719 141. Anisimova M, Nielsen R, Yang ZH. Effect of recombination on the accuracy of the likelihood  
1720 method for detecting positive selection at amino acid sites. *Genetics*. 2003;164(3):1229-36.  
1721 PubMed PMID: ISI:000184487400031.
- 1722 142. Abascal F, Zardoya R, Telford MJ. TranslatorX: multiple alignment of nucleotide sequences  
1723 guided by amino acid translations. *Nucleic Acids Res*. 2010;38(Web Server issue):W7-13. Epub  
1724 2010/05/04. doi: 10.1093/nar/gkq291. PubMed PMID: 20435676; PubMed Central PMCID:  
1725 PMC2896173.
- 1726 143. Gouveia-Oliveira R, Sackett PW, Pedersen AG. MaxAlign: maximizing usable data in an  
1727 alignment. *BMC Bioinformatics*. 2007;8:312. Epub 2007/08/30. doi: 10.1186/1471-2105-8-312.  
1728 PubMed PMID: 17725821; PubMed Central PMCID: PMC2000915.

1729
